1 ***Ferric Citrate Uptake is a Virulence Factor in Uropathogenic Escherichia coli***

2 Arwen E. Frick-Cheng<sup>1</sup>, Anna Sintsova<sup>2</sup>, Sara N. Smith<sup>1</sup>, Ali Pirani<sup>1</sup>, Evan S. Snitkin<sup>1</sup>, Harry L.T  
3 Mobley<sup>1</sup>

4

5 Working title: Ferric Citrate Uptake is a UPEC Virulence Factor

6

7 <sup>1</sup> Department of Microbiology and Immunology, University of Michigan, Ann Arbor, USA

8 <sup>2</sup> Department of Quantitative Biomedicine, University of Zurich, Zurich, Switzerland

9

10 Author order was determined by contribution.

11 Correspondence should be addressed to Harry L. T. Mobley (hmobley@med.umich.edu)

12

13 Keywords: urinary tract infection, *Escherichia coli*, iron acquisition, virulence factors,  
14 pathogenesis, siderophores, iron transport

15

16

17 **Abstract**

18 More than half of women will experience a urinary tract infection (UTI) with uropathogenic  
19 *Escherichia coli* (UPEC) causing ~80% of uncomplicated cases. Iron acquisition systems are  
20 essential for uropathogenesis, and UPEC encode functionally redundant iron acquisition systems,  
21 underlining their importance. However, a recent UPEC clinical isolate, HM7 lacks this functional  
22 redundancy and instead encodes a sole siderophore, enterobactin. To determine if *E. coli* HM7  
23 possesses unidentified iron acquisition systems, we performed RNA-sequencing under iron-  
24 limiting conditions and demonstrated that the ferric citrate uptake system (*fecABCDE* and *fecIR*)  
25 was highly upregulated. Importantly, there are high levels of citrate within urine, some of which is  
26 bound to iron, and the *fec* system is highly enriched in UPEC isolates compared to environmental  
27 or fecal strains. Therefore, we hypothesized that HM7 and other similar strains use the *fec* system  
28 to acquire iron in the host. Deletion of both enterobactin biosynthesis and ferric citrate uptake  
29 ( $\Delta$ *entB*/ $\Delta$ *fecA*) abrogates use of ferric citrate as an iron source and *fecA* provides an advantage  
30 in human urine in absence of enterobactin. However, in a UTI mouse model, *fecA* is a fitness  
31 factor independent of enterobactin production, likely due to the action of host Lipocalin-2 chelating  
32 ferrienterobactin. These findings indicate that ferric citrate uptake is used as an iron source when  
33 siderophore efficacy is limited, such as in the host during UTI. Defining these novel compensatory  
34 mechanisms and understanding the nutritional hierarchy of preferred iron sources within the  
35 urinary tract are important in the search for new approaches to combat UTI.

36

37 **Importance**

38 UPEC, the primary causative agent of uncomplicated UTI is responsible for five billion dollars in  
39 healthcare costs in the US each year. Rates of antibiotic resistance are on the rise therefore it is  
40 vital to understand the mechanisms of UPEC pathogenesis to uncover potential targets for novel  
41 therapeutics. Iron acquisition systems used to obtain iron from sequestered host sources are  
42 essential for UPEC survival during UTI and have been used as vaccine targets to prevent  
43 infection. This study reveals the ferric citrate uptake system is another important iron acquisition  
44 system that is highly enriched in UPEC strains. Ferric citrate uptake has not previously been  
45 associated with these pathogenic isolates, underlining the importance of the continued study of  
46 these strains to fully understand their mechanisms of pathogenesis.

47

## 48 Introduction

49 More than half of women will experience a urinary tract infection (UTI) during their lifetime,  
50 and 25% of infections recur (1, 2) with uropathogenic *Escherichia coli* (UPEC) causing 80% of  
51 uncomplicated cases (3, 4). These infections are responsible for an annual five billion dollars of  
52 health care costs in the U.S. alone (5, 6) To survive within the host UPEC encodes a wide array  
53 of virulence factors that include toxins, adhesins and iron acquisition systems (6-9). Iron is an  
54 essential cofactor for many biological processes including DNA replication, DNA repair, and  
55 central metabolism (10, 11). Consequently, mammalian hosts employ “nutritional immunity”  
56 wherein iron is sequestered within proteins or molecules such as transferrin, lactoferrin, ferritin,  
57 and hemoglobin and is not readily accessible to bacteria (12, 13). To survive in the host, UPEC  
58 has evolved mechanisms to acquire iron from these sequestered sources which fall into two broad  
59 categories: heme receptors and siderophores. Heme receptors import heme, allowing the bacteria  
60 to utilize the bound iron while siderophores are small molecules with extraordinarily high affinities  
61 for iron ( $K_d$  ranging from  $10^{23}$  to  $10^{52}$  M<sup>-1</sup>) (14, 15), which allow them to strip iron from sequestered  
62 sources.

63 UPEC can encode up to five iron acquisition systems: heme receptors (ChuA and Hma),  
64 and four siderophores (enterobactin, salmochelin aerobactin, and yersiniabactin) (16-18). UPEC  
65 strains often employ a subset of these systems. For example, prototypical UPEC strain CFT073  
66 encodes heme receptors and produces enterobactin, salmochelin and aerobactin. This high level  
67 of functional redundancy is essential for UPEC survival within the host due in part to specific host  
68 defenses. For example, the innate immune protein Lipocalin-2 (Lcn2) binds ferric and aferric  
69 enterobactin, preventing the bacterium from utilizing this siderophore (19). Therefore, UPEC  
70 cannot rely upon a single method of iron acquisition.

71 While heme receptors and siderophores are traditional iron acquisition systems utilized by  
72 UPEC and other pathogenic bacteria, there are other methods. For instance, citrate is a weak  
73 iron chelator and ferric citrate complexes can be imported through the ferric citrate transporter, or  
74 *fec* system (20, 21). A study investigating *E. coli* strains that caused bovine mastitis (MPEC)  
75 discovered that *fec* was a major pathogenic determinate of these strains; in 62 MPEC strains,  
76 ~98% encoded the *fec* system (22). The high citrate levels in milk (~10 mM) provide a pool of  
77 ferric citrate for these bacterial strains to use as an iron source via the *fec* system, allowing MPEC  
78 to grow in milk and induce mastitis (22).

79 Overall, little has been done to define the role of the *fec* system in the context of  
80 pathogenesis. However, there is a substantial body of work defining its regulation and mechanism  
81 of action. The *fec* system is composed of two operons, *fecIR* and *fecABCDE* (23-25). *fecIR* is Fur-  
82 regulated and expressed under iron-limiting conditions (26), while *fecABCDE*, is specifically  
83 transcribed via FecI, an alternative sigma factor, when ferric citrate is present (21, 26). FecA is a

84 TonB-dependent outer membrane receptor, and FecBCDE comprise an ABC transporter (23, 24,  
85 27).

86 In this study we have investigated the redundancy of iron acquisition systems in a  
87 collection of UPEC strains that caused symptomatic UTI in healthy, college-aged women (28, 29).  
88 One of these clinical isolates, HM7, lacked the functional redundancy in iron acquisition systems  
89 characteristic of most UPEC strains and only encoded a sole siderophore, enterobactin. While  
90 this strain lacks the traditional methods of iron acquisition and has no clear mechanism to prevent  
91 Lcn2 from inactivating enterobactin, it is clearly pathogenic as it was isolated from a young woman  
92 with cystitis and was present in the urine at  $\geq 10^5$  CFU/mL. In this study, we sought to determine  
93 how this novel strain acquires iron from the host. First, we empirically demonstrated that Lcn2-  
94 susceptible enterobactin is the sole siderophore produced by HM7. Then, using RNA-sequencing  
95 (RNA-seq), we found the ferric citrate uptake system highly upregulated under iron limitation.  
96 Furthermore, we discovered that the *fec* system is highly enriched in UPEC isolates when  
97 compared to fecal or environmental strains, and that there is a small, but significant cohort of  
98 UPEC strains that encode a single siderophore. Additionally, HM7 can use ferric citrate as an iron  
99 source through the *fec* system and enterobactin *in vitro*, and the *fec* system is a fitness factor *in*  
100 *vivo*. Our study characterizes ferric citrate uptake as a UPEC virulence factor, adding a novel iron-  
101 scavenging mechanism that UPEC uses to survive within the urinary tract.

102

## 103 Results

104 **Clinical UPEC isolate HM7 lacks all but one of the iron acquisition systems associated with**  
105 **UPEC.** Roughly, there are up to five systems that UPEC use to acquire iron from the host (**Fig.**  
106 **1A**). Most UPEC strains encode four of the five systems, including the three major UPEC type  
107 strains (CFT073, UTI89, and 536, **Fig. 1A, B**). However recent clinical isolate HM7 (28) encodes  
108 a single system, enterobactin, (**Fig. 1A, B**). After analyzing 487 publicly available UPEC strains  
109 on the bioinformatics resource PATRIC (30) (**Table S1**), 44 strains shared the same profile as  
110 HM7, indicating that HM7 is not an outlier, and potentially represents a previously unrecognized  
111 subset of UPEC strains (**Fig. 1B**).

112 **HM7 encodes a single siderophore.** It was not clear how HM7 acquired iron and survived in the  
113 host since the innate immune protein Lcn2 renders enterobactin unusable by bacteria (19).  
114 Therefore, we hypothesized that HM7 encodes a novel siderophore to acquire iron. To test this,  
115 we deleted the gene *entB* ( $\Delta entB$ ), which is sufficient to disrupt enterobactin production (17), and  
116 tested siderophore production by culturing the deletion mutant on Chrome Azurol S (CAS) agar,  
117 a colorimetric iron chelation assay (31). A color change from blue to orange on the plate indicates  
118 iron chelation, which is observed on the colony itself as well as a halo around the colony due to  
119 diffusion of secreted siderophores. The wildtype (WT) strain showed robust siderophore activity  
120 that was absent in the  $\Delta entB$  mutant but was subsequently restored by genetic complementation  
121 ( $\Delta entB^{+entB}$ ) (**Fig. 1C**). These results indicate that enterobactin is the sole siderophore system in  
122 HM7.

123 **Ferric citrate uptake is significantly upregulated during iron restriction.** HM7 did not make  
124 a novel siderophore, therefore, we predicted that it might utilize a previously undiscovered or  
125 understudied iron acquisition system. To identify a list of candidate genes, we used RNAseq to  
126 determine the iron regulon of HM7. We added increasing amounts of the iron-specific chelator  
127 2,2'-dipyridyl (Dip) to minimal M9 medium supplemented with 0.4% glucose to define an iron-  
128 restricted condition. The addition of 150  $\mu$ M Dip to the base medium was sufficient to modestly

129 limit growth due to iron restriction without introducing a severe growth defect (**Fig. S1A**). Based  
130 on previous literature (32, 33) M9 supplemented with 36  $\mu\text{M}$   $\text{FeCl}_3$  was the iron-replete condition  
131 (**Fig. S1A**). We confirmed these conditions reflected iron-restricted and iron-replete conditions  
132 through qRT-PCR; the iron-regulated gene *entF* was significantly and highly upregulated in the  
133 iron-restricted condition when compared to iron-replete (**Fig. S1B**).

134 HM7 was cultured to mid-log phase under these conditions in biological triplicate, its RNA  
135 isolated and sequenced. 368 genes were significantly downregulated in the iron-depleted  
136 condition (**Table S2**), while 393 genes were significantly upregulated (**Table 1, Table S2**). As  
137 expected, we observed that the genes for enterobactin biosynthesis and uptake as well as genes  
138 associated with iron-starvation (*nrdEFH* (34)) were upregulated (**Table 1**). Two transport systems  
139 related to iron were significantly upregulated. One was *mntH* which takes up both  $\text{Mn}^{2+}$ , and  $\text{Fe}^{2+}$ ,  
140 although with a preference for  $\text{Mn}^{2+}$  (35). The other system was ferric citrate uptake, which is  
141 composed of two operons, *fecIR*, encoding the system's regulatory element and  $\sigma$  factor, and  
142 *fecABCDE* encoding the outer membrane receptor and transport elements (**Fig. 2A**).  
143 Interestingly, *fecD* was not significantly upregulated. Unlike *mntH*, the *fec* system takes up  $\text{Fe}^{3+}$   
144 which is dominant form of iron in the urinary tract as opposed to  $\text{Fe}^{2+}$ . Furthermore, citrate is  
145 present is extremely high levels in the urinary tract, normal levels in healthy individuals vary from  
146 1.7-6.6 mM (36). Given that MPEC uses ferric citrate in bovine milk, and the citrate concentration  
147 in milk (~10mM) is comparable to the concentration in urine, we hypothesized that UPEC is using  
148 a similar mechanism in the urinary tract.

149 ***fecA* is highly prevalent UPEC strains.** We wanted to establish the prevalence of the *fec* system  
150 in UPEC strains, since three UPEC type strains, CFT073, UTI89 and 536 lack the *fec* system  
151 (**Fig. 1B**). When we interrogated the cohort of 487 UPEC strains, we found that ~50% of them  
152 encoded the outer membrane receptor *fecA*, compared to only ~12% in 107 fecal or  
153 environmental *E. coli* isolates (**Fig. 2B**). This is a highly significant association, with an odds ratio  
154 of 7.1, supporting the hypothesis of ferric citrate uptake as a UPEC virulence factor. Interestingly,  
155 this enrichment seems to be even more profound in UPEC strains with a single iron acquisition  
156 system; ~65% of these "HM7-like" strains also encoded *fecA* compared to ~47% of strains with  
157 four traditional iron acquisition systems (**Fig. 2C**).

158 ***fecA* is responsive to physiologically relevant levels of citrate.** HM7 is a mostly  
159 uncharacterized clinical isolate, therefore we wanted to determine if the *fec* system is fully  
160 functional, and responsive to citrate at physiologically relevant levels. We cultured WT HM7 in M9  
161 medium with glucose as a carbon source and supplemented with concentrations of citrate ranging  
162 from 10  $\mu\text{M}$  up to 100 mM, which encompasses urinary citrate levels in a healthy population (36).  
163 We quantified *fecA* gene expression compared to M9 without citrate. We observed significant  
164 upregulation at 100  $\mu\text{M}$ , 1 mM, and 10 mM citrate (**Fig. 2D**) and importantly, some of the strongest  
165 upregulation occurred at physiologically relevant concentrations (1 mM and 10 mM citrate). We  
166 also tested *fecA* expression in *ex vivo* urine pooled from healthy female volunteers, compared to  
167 expression in LB. *fecA* was significantly upregulated (**Fig. 2D**) in this physiologically relevant  
168 medium.

169 ***fecA* is more highly upregulated in the absence of enterobactin.** Next, we wanted to  
170 determine if ferric citrate uptake could act as a compensatory mechanism in the absence of  
171 enterobactin, indicating the strain can use ferric citrate as an alternative iron source. Accordingly,  
172 we repeated the citrate sensitivity experiments using the  $\Delta\text{entB}$  mutant. Significant upregulation  
173 at 100  $\mu\text{M}$ , 1 mM, and 10 mM citrate was recapitulated in the mutant strain (**Fig. 2D**). Furthermore,

174 at both 100  $\mu$ M and 1 mM citrate the  $\Delta entB$  mutant had significantly higher expression of *fecA*  
175 compared to WT, a phenomenon that was trending in all concentrations of citrate. Interestingly,  
176 while expression of *fecA* dropped at 100 mM citrate in WT, it remained highly elevated in the  
177  $\Delta entB$  mutant, indicating that perhaps enterobactin is the preferred mechanism for iron  
178 acquisition, but in its absence, the *fec* system can be utilized. These results support the  
179 hypothesis that HM7 is using ferric citrate as an iron source, especially in the absence of  $Fe^{3+}$   
180 uptake by siderophores.

181 **HM7 uses ferric citrate as an iron source through the *fec* system or enterobactin.** To  
182 determine if HM7 can use ferric citrate as an iron source, we added high levels (100 mM) of citrate  
183 to M9 mediums so most of the iron would be complexed within citrate. The bacteria have two  
184 ways to acquire iron: either enterobactin will chelate iron from ferric citrate, or the *fec* system will  
185 import ferric citrate. To nullify ferric citrate uptake, we deleted the outer membrane receptor gene,  
186 *fecA* ( $\Delta fecA$ ). We also constructed a double mutant ( $\Delta fecA/\Delta entB$ ). With these assumptions, only  
187 the double mutant,  $\Delta fecA/\Delta entB$ , would have a growth defect at high citrate concentrations, since  
188 the  $\Delta fecA$  mutant could still utilize enterobactin, and the  $\Delta entB$  mutant could still utilize the *fec*  
189 system. As expected, only the  $\Delta fecA/\Delta entB$  mutant had a profound growth defect with the addition  
190 of 100 mM citrate (**Fig. 3Aii**) while none of the mutants had a growth defect in LB or M9 medium  
191 alone (**Fig. S2, Fig 3Ai**). This is an iron-specific defect since chemical complementation with 1  
192 mM  $FeCl_3$  rescued the growth of the double mutant (**Fig. 3Aiii**).

193 To establish that HM7 could specifically use the *fec* system to acquire iron via ferric citrate,  
194 we took a genetic approach, complementing the  $\Delta fecA/\Delta entB$  double mutant with each single  
195 system. Unsurprisingly, growth of the  $\Delta fecA/\Delta entB$  double mutant was rescued by genetic  
196 complementation with *entB* (**Fig. 3Ci, ii, and iii**). However, *fecABCDE* was also sufficient to  
197 rescue growth (**Fig. 3Bi, ii, and iii**). *fecA* was not sufficient to rescue growth, indicating that the  
198  $\Delta fecA$  mutant is a polar mutation, although that does not change the interpretation of our previous  
199 results.

200 **Ferric citrate uptake is an *in vitro* fitness factor when HM7 cannot utilize enterobactin.** The  
201 association of *fecA* with UPEC strains (**Fig. 2B**) and HM7 using ferric citrate as an iron source  
202 (**Fig. 3**) indicates that the presence of the *fec* system could provide UPEC with a competitive  
203 advantage. Initially we assessed growth of WT HM7, and the three mutants,  $\Delta fecA$ ,  $\Delta entB$ ,  
204  $\Delta fecA/\Delta entB$ , in pooled *ex vivo* urine (**Fig. S3**). Surprisingly there seemed to be no significant  
205 growth defect in any of these mutants compared to WT. Therefore, we turned to a more sensitive  
206 assay to assess the advantage the *fec* could provide and performed competition experiments in  
207 pooled human urine. We tested WT against the  $\Delta fecA$  mutant and observed that there was no  
208 competitive disadvantage of the mutant strain compared to WT (**Fig. 4A**). Both strains could still  
209 use enterobactin, indicating that perhaps the siderophore is the preferred mechanism to acquire  
210 iron. This was confirmed when competing WT and  $\Delta entB$ ; the mutant had a subtle, but significant  
211 disadvantage (**Fig. 4A**). This disadvantage was exacerbated and trended towards significance  
212 when WT was competed against the  $\Delta fecA/\Delta entB$  double mutant (**Fig. 4A**), indicating that both  
213 systems contribute to the survival of HM7, but the function of enterobactin masks the role of *fec*.

214 To dissect the precise contribution of the *fec* system, we competed the  $\Delta entB$  mutant with  
215 the  $\Delta fecA/\Delta entB$  double mutant. The double mutant had a significant defect (**Fig. 4B**). This defect  
216 is largely specific to the *fec* system since complementing the double mutant with *fecABCDE* was  
217 sufficient to partially rescue the defect (**Fig. 4B**). In the urinary tract during infection, Lcn2  
218 counteracts enterobactin. Therefore, to mimic the host's infectious environment, we added

219 recombinant Lcn2 to these competitions. We determined that 25 µg/mL of Lcn2 was sufficient to  
220 inhibit HM7 growth in an iron-limited environment (**Fig. S4**) and then supplemented that amount  
221 to pooled human urine and competed WT and the  $\Delta fecA$  mutant. With the addition of Lcn2, the  
222  $\Delta fecA$  mutant now had a significant competitive disadvantage (**Fig. 4C**). This provides further  
223 evidence that in the absence or inhibition of enterobactin the *fec* system is a fitness factor.

224 **Ferric citrate uptake is an *in vivo* fitness factor.** Finally, we wanted to determine if the *fec*  
225 system was an *in vivo* fitness factor. Using the ascending UTI mouse model, we co-infected  
226 female CBA/J mice with WT and the  $\Delta fecA$  mutant, allowed the infection to progress for 48 hours  
227 and harvested the urine, bladder, and kidneys to calculate log<sub>10</sub>C.I. The  $\Delta fecA$  mutant had a  
228 significant disadvantage in all three organ sites (**Fig. 5**), definitively defining it as a fitness factor.

229 We hypothesized that the  $\Delta fecA$  mutant had a defect *in vivo*, due to the presence of Lcn2,  
230 as we saw in our *in vitro* competitions that were supplemented with Lcn2 (**Fig. 4C**). Lcn2 is highly  
231 elevated in the bladders and kidneys of mice infected with WT HM7 (**Fig. S5A, B**). Lcn2 levels  
232 correlated with increased CFU burden in the kidneys, where it is produced (37) (**Fig. S5C**). To  
233 determine if Lcn2 was responsible for the competitive disadvantage of the  $\Delta fecA$  mutant, we  
234 repeated the competition experiments with Lcn2 knock-out mice (*Lcn2*<sup>-/-</sup>). However, the *Lcn2*<sup>-/-</sup>  
235 mice are in a different genetic background, C57BL/6, rather than CBA/J, so we repeated the  
236 competition in the WT (C57BL/6) mouse background as well. While there was a subtle difference  
237 in the log<sub>10</sub>C.I. of the bladders between WT and *Lcn2*<sup>-/-</sup> mice that was trending towards  
238 significance, the  $\Delta fecA$  mutant no longer had a disadvantage compared to WT in the C57BL/6  
239 background (**Fig. S6**). This discrepancy in results indicates the differences between the mouse  
240 strains. Overall, we conclude that ferric citrate uptake through the *fec* system is a *bona fide* fitness  
241 factor in UPEC strain HM7, allowing it to acquire iron from the host in a manner not inhibited by  
242 Lcn2.

## 243 Discussion

244 Iron acquisition is an essential virulence factor in UPEC, because most iron in the host is  
245 sequestered. Subsequently, UPEC relies on specific iron acquisition systems such as  
246 siderophores or heme receptors to scavenge iron from otherwise inaccessible sources and these  
247 systems are essential for UPEC pathogenesis (10, 38, 39). Our work shows there is another  
248 understudied and overlooked iron acquisition system that enhances UPEC pathogenesis: ferric  
249 citrate uptake, encoded by the *fec* system.

250 Our study focuses on a recent clinical UPEC isolate, HM7. This strain encodes a sole  
251 siderophore, enterobactin, and lacks the functional redundancy in iron acquisition systems  
252 normally observed in UPEC strains. We assumed that HM7 was employing another method to  
253 acquire iron from the host and used RNA-seq to define its iron regulon. Under iron-limiting  
254 conditions, we found almost every component of ferric citrate uptake (*fecABCE* and *fecI/R*) was  
255 highly and significantly upregulated (**Table 1, Table S2, Fig. 2A**). Interestingly, *fecD* was not  
256 highly upregulated. While the rest of the genes in the system had log<sub>2</sub> fold-change (FC) values  
257 ranging from 2.6-5.1, *fecD* had a log<sub>2</sub>FC of 0.8, and unlike the rest, this change was not significant.  
258 This is intriguing given that *fecD* is the second to the last gene in the operon, and yet the gene  
259 after it, *fecE*, is significantly and highly upregulated. *fecD* and *fecC* encode the permeases of the  
260 transport system that form a channel in the inner membrane of the bacterium (24, 40). Permeases  
261 can form homodimers, or heterodimers, and it is tempting to speculate the modest upregulation  
262 of *fecD* indicates that there is a preference for FecC homodimers as opposed to FecC/FecD  
263 heterodimers. Potentially, there could be an alternative start site that *fecE* utilizes, explaining its  
264 higher expression levels. *fecE* encodes the ATPase of this system (40), which is essential for

265 activity of this ABC transporter. However, precisely defining this mechanism will require future  
266 studies.

267 We uncovered a strong association of the *fec* system with UPEC strains compared to fecal  
268 or environmental strains, another indication that the *fec* system is a virulence factor. (**Fig. 2B**).  
269 Given how common the *fec* system is within UPEC and MPEC, it could be a virulence factor in  
270 other pathogenic *E. coli*. For example, the citrate levels in plasma vary from 100-150  $\mu$ M (41) and  
271 while these levels are lower than in urine or milk, they are still sufficient for robust upregulation of  
272 *fecA* (**Fig. 2D**). Potentially the *E. coli* that cause bloodstream infections could also utilize *fec* to  
273 acquire iron. In fact, a recent study exploring conjugative plasmids in pathogenic *E. coli* found a  
274 plasmid that encoded the *fec* system conferred a modest *in vivo* competitive advantage during  
275 bacteremia (42). This was also tested in the UTI model, and when this plasmid was conjugated  
276 into a different *E. coli* strain loss of *fec* resulted in an extremely mild reduction in fitness ( $\log_{10}$ C.I.  
277  $\sim$ -0.1 in the bladder, and  $\sim$ -0.2 in the kidneys). However, this result could not be recapitulated in  
278 its parent strain. Other iron acquisition systems in these strains were not defined and could explain  
279 the divergence of results, demonstrating how functional redundancy of iron acquisition systems  
280 can mask the contributions of specific systems.

281 The *fec* system seems lower on the hierarchy of iron acquisition systems but becomes  
282 more important the fewer iron acquisition systems a strain produces. In a large cohort of UPEC  
283 strains, about  $\sim$ 9% encoded a single traditional iron acquisition system, enterobactin, like HM7.  
284 While a relatively small percentage, it is still a part of the population that would likely rely more  
285 heavily on a system like *fec*, especially given that enterobactin is not highly effective in the urinary  
286 tract (38). This seems to be case since the *fec* system in these isolates is more enriched  
287 compared to more traditional UPEC strains (**Fig. 2C**). Interestingly, a very small population of  
288 these strains (2%) seemed to encode none of the traditional iron acquisition systems. However,  
289 the sequencing quality of these genomes is quite poor, and follow up studies are needed to  
290 confirm these results. If these results are confirmed, these strains could be an excellent tool to  
291 discover additional novel or understudied iron acquisition systems.

292 *In vitro* competition in pooled human urine showed that the *fec* system provides a  
293 competitive advantage, but this advantage is contingent on the absence of enterobactin (**Fig. 4**).  
294 Enterobactin seems to be the preferred method of iron acquisition *in vitro*, since loss of  
295 enterobactin is sufficient to cause a small reduction in fitness (**Fig. 4A**). Furthermore, addition of  
296 Lcn2 was sufficient to inhibit the function of enterobactin, allowing the *fec* system to provide an  
297 advantage (**Fig. 4C**). Lcn2 is present in high levels in the urinary tract during infection (43);  
298 therefore, these *in vitro* competitions with the addition of Lcn2 are likely a closer representation  
299 of UTI.

300 The gene expression profile of UPEC during CBA/J mouse infection closely mimics the  
301 UPEC transcriptome during human infection (44). Therefore, we are reasonably confident that the  
302 results from the mouse model are relevant to human infection. When WT HM7 was competed  
303 against the  $\Delta$ *fecA* mutant, the mutant had a disadvantage in the urine, bladder, and kidneys (**Fig.**  
304 **5**). While this result is different than the *in vitro* competition in human urine alone, it aligns with  
305 the *in vitro* competitions supplemented with Lcn2 and implies that the *fec* system provides an  
306 advantage *in vivo* because HM7 is unable to use enterobactin. This is likely caused by Lcn2; mice  
307 infected with HM7 had increased production of Lcn2 in the bladder and kidneys (**Fig. S5**).

308 We attempted to confirm this hypothesis using *Lcn2*<sup>-/-</sup> mice. If Lcn2 is essential for the  
309 competitive advantage of the *fec* system that advantage should be abrogated in the knock-out  
310 line. The *Lcn2*<sup>-/-</sup> mice were in a C57BL/6 background, therefore, we re-tested WT HM7 and  $\Delta$ *fecA*  
311 mutant in WT C57BL/6 mice. Unfortunately, there was no loss in fitness in the  $\Delta$ *fecA* mutant in  
312 WT C57BL/6 mice (**Fig. S6**). However, there are several genetic differences between these

313 mouse lines (45) that could account for these differences. For example, of the 10 CBA/J mice we  
314 infected, 100% of them had kidney colonization, while only 35% of the 20 C57BL/6 mice had  
315 kidney colonization. While the contribution of *Lcn2* to the mechanism of ferric citrate uptake via  
316 the *fec* system has not been definitively proven, it seems a promising explanation.

317 In summary, we have uncovered a novel mechanism by which UPEC acquires iron from  
318 the host via ferric citrate uptake. During UTI *Lcn2* is highly produced, blocking the usage of  
319 enterobactin. In response, UPEC uses the *fec* system to import ferric citrate present in the urinary  
320 tract as an iron source (**Fig. 6**). The *fec* system is highly prevalent in UPEC strains and is yet  
321 another instrument in its highly diverse arsenal to survive within the harsh environment of the  
322 urinary tract.

## 323 **Acknowledgments**

324 This work was supported by Public Health Service grant R01AI059722 from the National Institutes  
325 of Health. We would also like to thank members of Dr. Michael Bachman's lab, specifically, Dr.  
326 Jay Vornhagen for providing us with the expression plasmid for *Lcn2* purification and Dr. Caitlyn  
327 L. Holmes for both the WT and *Lcn2*<sup>-/-</sup> C57BL/6 mice.

328

## 329 **Methods**

### 330 **Bacterial culture conditions, growth curves, mutant construction, and complementation.**

331 Clinical UPEC isolate HM7 was routinely cultured at 37°C with aeration in LB, M9 medium  
332 supplemented with glucose, or filter-sterilized pooled human urine. Mutant and complemented  
333 strains were cultured with antibiotics. Mutants were constructed using lambda red mutagenesis  
334 and complementation vectors constructed with Gibson assembly. For a detailed description, refer  
335 to **Text S1**.

### 336 **Chrome Azurol S Assay.**

337 Chrome Azurol S (CAS)-agar was prepared as defined in (31). Strains were cultured overnight  
338 with aeration at 37°C in LB with appropriate antibiotics. Five µL of the overnight culture was  
339 spotted onto the CAS-agar plate, and then incubated overnight at 37°C. The next morning the  
340 plates were imaged using Qcount Software.

### 341 **RNA isolation and library preparation, and sequencing.**

342 *E. coli* HM7 was cultured overnight in M9 medium, supplemented with 0.4% glucose, shaking at  
343 37°C. Overnight cultures were diluted 1:100 in M9 medium with 0.4% glucose supplemented with  
344 either 36 µM FeCl<sub>3</sub> (Sigma), or 150 µM 2,2' Dipyridyl (Sigma) and grown to mid-log phase (0.4-  
345 0.6 OD<sub>600</sub>). Cultures were then treated with Bacterial RNA Protect (Qiagen), harvested by  
346 centrifugation and the pellets stored at -80°C. This was performed in biological triplicate. RNA  
347 was isolated using a similar method from (28, 44). The libraries were prepared using NEBNext  
348 Ultra II Directional RNA Library Prep Kit and sequenced using an Illumina NextSeq-500 (paired  
349 end, 38 bp read length). For a detailed description, refer to **Text S1**.

### 350 **Genome assembly, RNA-seq data processing and differential expression analysis.**

351 Raw sequencing data was preprocessed using BBTools (38.18) (46). BBDuk was used to remove  
352 Illumina adapter sequences, and to quality trim and filter the reads (minlength=20, trimq=14,



353 maq=20, maxns=1). The HM7 genome was re-assembled based on sequencing from (28) using  
354 Flye long read assembler (47) with Trestle repeat resolve parameter on then the quality controlled  
355 reads were aligned to the HM7 genome using BWA (0.7)(48). The resulting alignment files were  
356 filtered (mapping quality > 10) using samtools (1.11) (49) with counts for each feature were  
357 generated using htseq-count (0.13.5) (50). Alignment details shown in **Table S3**. Differential  
358 expression analysis was performed using R package DESeq2 (51).

### 359 **qRT-PCR.**

360 Strains were grown to mid-log cultures and RNA isolated as described above and reverse-  
361 transcribed into cDNA using iScript (Biorad). qRT-PCR was performed on a QuantStudio 3 PCR  
362 machine (Applied Biosystems) using PowerUp Syber Green mastermix (Applied Biosystems). For  
363 a detailed description, refer to **Text S1**.

### 364 **Purification of Lipocalin-2.**

365 Recombinant human Lipocalin-2 (Lcn2) expressed as a glutathione S-transferase (GST) fusion  
366 protein (52) (a kind gift from Dr. Michael Bachman) in XL-1 Gold *E. coli* protein was purified in a  
367 similar manner as previously described (53, 54). For a detailed description, refer to **Text S1**.

### 368 **In vitro growth competition.**

369 Strains were cultured overnight in M9 medium supplemented with 0.4% glucose at 37°C with  
370 aeration and appropriate antibiotic selection. The next day, the OD<sub>600</sub> was determined for each  
371 strain, the strains were OD<sub>600</sub>-matched, and then diluted 1:100 into 3 mL of pooled human urine.  
372 Where applicable, Lcn2 was added to a final concentration of 25 µg/mL, or the vehicle control  
373 (25% glycerol) in an equal volume. 0.5% arabinose (final concentration) induced the  
374 complemented strains, and ampicillin added to maintain the plasmid. Input CFUs were determined  
375 for each strain through drip plating of serial dilutions on plain LB agar and antibiotic selection  
376 (chloramphenicol or kanamycin). The strains were then grown overnight, shaking at 37°C, and  
377 the output CFU of each strain determined in the same manner as the input.

378 C.I. is a ratio of the input versus the output and is calculated as follows:

$$379 \frac{\text{mutant output} / \text{WT output}}{\text{mutant input} / \text{WT input}}$$

380 Log<sub>10</sub>CI <0 indicates that the WT outcompetes the mutant, and a log<sub>10</sub>CI >0 indicates the mutant  
381 outcompetes the WT. When competing  $\Delta entB$  and  $\Delta fecA/\Delta entB$ ,  $\Delta entB$  was “WT”, and  
382  $\Delta fecA/\Delta entB$  was “mutant”. When competing  $\Delta entB eV$  and  $\Delta fecA^{+fec}/\Delta entB$ ,  $\Delta entB eV$  was “WT”,  
383 and  $\Delta fecA^{+fec}/\Delta entB$  was “mutant”.

### 384 **Murine UTI model.**

385 We used three different mouse strains: CBA/J, C57BL/6 WT and C57BL/6 *Lcn2*<sup>-/-</sup> (55). CBA/J  
386 mice were purchased from Jackson Laboratories, while both the C57BL/6 WT and C57BL/6  
387 *Lcn2*<sup>-/-</sup> mice were a kind gift from Dr. Michael Bachman and bred in-house. All mice used were  
388 female. For a detailed description, refer to **Text S1**.

389

390

391 **Data accessibility.**

392 Data available on in NCBI's Gene Expression Omnibus repository under accession number  
393 GSE188170.

394

395

**Table 1: Top 50 Significantly Upregulated Genes Under Iron Limitation**

| Gene                  | Description                                                              | Log <sub>2</sub> FC <sup>a</sup> | Locus Tag      |
|-----------------------|--------------------------------------------------------------------------|----------------------------------|----------------|
| <i>adhP</i>           | alcohol dehydrogenase                                                    | 4.6                              | b1478          |
| <i>aroF</i>           | Phospho-2-dehydro-3-deoxyheptonate aldolase                              | 4.1                              | EICMKPFN_03556 |
| <i>bioA</i>           | adenosylmethionine-8-amino-7-oxononanoate aminotransferase               | 4.0                              | b0774          |
| <i>cirA</i>           | outer membrane receptor for ferrienterochelin and colicins               | 5.0                              | b2155          |
| <i>EICMKPFN_01803</i> | phosphate starvation-inducible protein                                   | 3.9                              | EICMKPFN_01803 |
| <i>EICMKPFN_02077</i> | hypothetical protein                                                     | 4.2                              | EICMKPFN_02077 |
| <i>EICMKPFN_02251</i> | Glyceraldehyde-3-phosphate dehydrogenase                                 | 4.7                              | EICMKPFN_02251 |
| <i>EICMKPFN_02252</i> | Glyceraldehyde-3-phosphate dehydrogenase                                 | 4.5                              | EICMKPFN_02252 |
| <i>EICMKPFN_03110</i> | Colicin I receptor                                                       | 4.5                              | EICMKPFN_03110 |
| <i>entA</i>           | 2,3-dihydro-2,3-dihydroxybenzoate dehydrogenase                          | 5.4                              | b0596          |
| <i>entB</i>           | enterobactin synthase component B                                        | 5.8                              | b0595          |
| <i>entC</i>           | isochorismate synthase EntC                                              | 4.7                              | b0593          |
| <i>entD</i>           | enterobactin synthetase component D                                      | 5.0                              | b0583          |
| <i>entE</i>           | 2,3-dihydroxybenzoate-AMP ligase                                         | 5.1                              | b0594          |
| <i>entF</i>           | enterobactin synthetase component F                                      | 6.9                              | b0586          |
| <i>entH</i>           | proofreading thioesterase in enterobactin biosynthesis                   | 5.0                              | b0597          |
| <i>fecA</i>           | ferric citrate outer membrane transporter                                | 4.8                              | b4291          |
| <i>fecl</i>           | RNA polymerase $\sigma^{19}$ factor                                      | 5.2                              | b4293          |
| <i>fecR</i>           | regulator for <i>fec</i> operon                                          | 5.3                              | b4292          |
| <i>fepA</i>           | ferric enterobactin receptor                                             | 5.4                              | b0584          |
| <i>fes</i>            | Fe <sup>3+</sup> -enterobactin esterase                                  | 5.3                              | b0585          |
| <i>fhuE</i>           | outer-membrane receptor for ferric coprogen and ferric-rhodotorulic acid | 5.4                              | b1102          |
| <i>fhuF</i>           | ferric iron reductase protein                                            | 4.6                              | b4367          |
| <i>fiu</i>            | catecholate siderophore receptor                                         | 4.4                              | b0805          |
| <i>gabP</i>           | 4-aminobutyrate:H(+) symporter                                           | 4.7                              | b2663          |
| <i>gadA</i>           | glutamate decarboxylase A                                                | 5.1                              | b3517          |
| <i>gadB</i>           | glutamate decarboxylase B                                                | 5.2                              | b1493          |
| <i>gadC</i>           | L-glutamate:4-aminobutyrate antiporter                                   | 5.4                              | b1492          |
| <i>gcd</i>            | quinoprotein glucose dehydrogenase                                       | 4.2                              | b0124          |
| <i>hchA</i>           | D-lactate dehydratase                                                    | 4.5                              | b1967          |
| <i>mntH</i>           | manganese transport protein                                              | 5.6                              | b2392          |
| <i>nrdE</i>           | ribonucleoside-diphosphate reductase 2 subunit alpha                     | 6.1                              | b2675          |
| <i>nrdF</i>           | ribonucleoside-diphosphate reductase 2 subunit beta                      | 6.8                              | b2676          |
| <i>nrdH</i>           | glutaredoxin-like protein                                                | 6.3                              | b2673          |
| <i>nrdI</i>           | protein involved in ribonucleotide reduction                             | 5.9                              | b2674          |

|             |                                                |     |       |
|-------------|------------------------------------------------|-----|-------|
| <i>phoH</i> | phosphate starvation-inducible protein         | 4.1 | b1020 |
| <i>sufC</i> | Fe-S cluster assembly ATP-binding protein      | 4.0 | b1682 |
| <i>sufD</i> | Fe-S cluster assembly protein                  | 4.1 | b1681 |
| <i>sufE</i> | cysteine desulfuration protein                 | 3.8 | b1679 |
| <i>sufS</i> | selenocysteine lyase                           | 4.1 | b1680 |
| <i>tyrA</i> | chorismate mutase                              | 3.7 | b2600 |
| <i>ybdZ</i> | enterobactin biosynthesis protein              | 6.1 | b4511 |
| <i>ybgS</i> | uncharacterized protein                        | 4.3 | b0753 |
| <i>ybiX</i> | PKHD-type hydroxylase                          | 3.7 | b0804 |
| <i>yciG</i> | uncharacterized protein                        | 4.5 | b1259 |
| <i>yddM</i> | putative DNA-binding transcriptional regulator | 4.6 | b1477 |
| <i>ydiE</i> | uncharacterized protein                        | 4.2 | b1705 |
| <i>yjjZ</i> | uncharacterized protein                        | 7.3 | b4567 |
| <i>yncE</i> | PQQ-like domain-containing protein             | 5.0 | b1452 |
| <i>yohC</i> | putative inner membrane protein                | 3.7 | b2135 |

<sup>a</sup>FC, fold change.

396

397

**Table 2: List of Strains and Plasmids**

| <b>Strain</b>             | <b>Genotype/Description</b>                                                                                   | <b>Reference/Source</b> |
|---------------------------|---------------------------------------------------------------------------------------------------------------|-------------------------|
| HM7                       | Wild-type cystitis causing uropathogenic <i>E. coli</i> strain, isolated from a healthy young woman in 2012   | (28)                    |
| $\Delta entB$             | HM7 <i>entB::kan</i> , Kan <sup>r</sup>                                                                       | This study              |
| $\Delta fecA$             | HM7 <i>fecA::cam</i> , Cam <sup>r</sup>                                                                       | This study              |
| $\Delta fecA/\Delta entB$ | HM7 <i>fecA::cam/entB::kan</i> , Cam <sup>r</sup> , Kan <sup>r</sup>                                          | This study              |
| <b>Plasmid</b>            | <b>Description</b>                                                                                            | <b>Reference/Source</b> |
| pGEN eV                   | Low copy number, promoterless plasmid, Spec <sup>r</sup>                                                      | This study              |
| pBAD eV                   | pBAD- <i>Myc/His A</i> , low copy number, arabinose inducible plasmid, Amp <sup>r</sup>                       | Thermo-Fisher           |
| pGEN <i>entB</i>          | <i>entB</i> with native promoter, cloned from HM7 via Gibson assembly, Spec <sup>r</sup>                      | This study              |
| pBAD <i>fecABCDE</i>      | <i>fec</i> operon ( <i>fecABCDE</i> ) cloned from HM7 inserted into MCS via Gibson assembly, Amp <sup>r</sup> | This study              |
| pGEX-4T-3 LCN             | Human Lipocalin-2 glutathione S-transferase (GST) fusion protein, Amp <sup>r</sup>                            | (53)                    |

398

399

**Table 3: Primers used in study**

| Gene or Plasmid                            | Forward Primer                                                                                        | Reverse Primer                                                                                          |
|--------------------------------------------|-------------------------------------------------------------------------------------------------------|---------------------------------------------------------------------------------------------------------|
| <i>entB</i> <sup>a</sup>                   | <u>ATTCCAAAATTACAGGCTTACGC</u><br><u>ACTGCCGGAGTCGTGTAGGCTG</u><br>GAGCTGCTTC                         | <u>CACCTCGCGGGAGAGTAGCTT</u><br><u>CCACCAGGCGTCTGAATGGGAA</u><br>TTAGCCATGGTCC                          |
| <i>fecA</i> <sup>a</sup>                   | <u>GATGATGGGGAAGGTATGACGC</u><br><u>CGTTACGCGTTTTTCGTAACA</u><br><u>ACACCGTGTAGGCTGGAGCTGC</u><br>TTC | <u>CCGGGCGTTAACACATCAGAA</u><br><u>CTTCAACGACCCCTGCATATAC</u><br><u>AGCGTGCATGGGAATTAGCCA</u><br>TGGTCC |
| <i>P<sub>native</sub>entB</i> <sup>b</sup> | CGGTACCAAGCTTCATATGCACA<br>AATCAGCTTCCTGTTATTAATAAG<br>GGAGGATGATATGGCTATTCCAA<br>AATTACAGG           | GAATAGCCATATCATCCTCCAC<br>AAAATG                                                                        |
| <i>entB</i> <sup>b</sup>                   | GAGATCTGCAGCTGGTACCAAT<br>GACGCCGTTACGCGTTTTTCG                                                       | TTCCTGCAGGGCATGCCCCGT<br>TATTTACCTCGCGGGAG                                                              |
| <i>fecABCDE</i> <sup>b</sup>               | GAGATCTGCAGCTGGTACCAAT<br>GACGCCGTTACGCGTTTTTCG                                                       | CCAAGCTTCGAATTCCCATAACC<br>TCATTAGGCACATCGGCCTGCS<br>GCATATGAAGCTTGGTACCGG<br>GATCCGC                   |
| pGEN <sup>b</sup>                          | CGGGGCATGCCCTGCAGG                                                                                    | TGGTACCAGCTGCAGATCTCG<br>AGC                                                                            |
| pBAD <sup>b</sup>                          | TATGGGAATTCGAAGCTTGGGC<br>CCG                                                                         | TACCTGGAGCAAGGCAAAC                                                                                     |
| <i>fecA</i> <sup>c</sup>                   | CGGAAGGGCCGATCATAAA                                                                                   | CCCGATAGCTGAACTGGTAAC                                                                                   |
| <i>entF</i> <sup>c</sup>                   | TTCCAGAAACCACGCTGAG                                                                                   | CGATCAGATGACCGTCTTTTAC                                                                                  |
| gapA <sup>c</sup>                          | CGACCTGTTAGACGCTGATTAC                                                                                |                                                                                                         |

400

401 <sup>a</sup>Used for lambda red mutagenesis; <sup>b</sup>used for Gibson assembly; <sup>c</sup>used for qRT-PCR. Primers  
402 are listed in 5' to 3', underlined sequences for mutant construction indicate regions homologous  
403 to gene of interest.

404

- 405 1. Foxman B. 1990. Recurring urinary tract infection: incidence and risk factors. *Am J*  
406 *Public Health* 80:331-3.
- 407 2. Flores-Mireles AL, Walker JN, Caparon M, Hultgren SJ. 2015. Urinary tract infections:  
408 epidemiology, mechanisms of infection and treatment options. *Nature Reviews*  
409 *Microbiology* 13:269-284.
- 410 3. Gupta K, Hooton TM, Wobbe CL, Stamm WE. 1999. The prevalence of antimicrobial  
411 resistance among uropathogens causing acute uncomplicated cystitis in young women.  
412 *Int J Antimicrob Agents* 11:305-8.
- 413 4. O'Hanley P. 1996. Prospects for urinary tract infection vaccines, p 405-425. *In* Mobley  
414 HLT, Warren JW (ed), *Urinary tract infections : molecular pathogenesis and clinical*  
415 *management*. ASM Press, Washington, D.C.
- 416 5. Litwin MS, Saigal CS. 2007. Introduction. GPO, Washington, D.C.
- 417 6. Terlizzi ME, Gribaudo G, Maffei ME. 2017. UroPathogenic *Escherichia coli* (UPEC)  
418 Infections: Virulence Factors, Bladder Responses, Antibiotic, and Non-antibiotic  
419 Antimicrobial Strategies. *Frontiers in Microbiology* 8.

- 420 7. Alteri CJ, Mobley HLT. 2015. Metabolism and Fitness of Urinary Tract Pathogens.  
421 Microbiology Spectrum 3.
- 422 8. Sivick KE, Mobley HLT. 2010. Waging war against uropathogenic *Escherichia coli*:  
423 winning back the urinary tract. *Infection and immunity* 78:568-585.
- 424 9. Subashchandrabose S, Mobley HLT. 2015. Virulence and Fitness Determinants of  
425 Uropathogenic *Escherichia coli*. *Microbiology spectrum* 3:10.1128/microbiolspec.UTI-  
426 0015-2012.
- 427 10. Mike LA, Smith SN, Sumner CA, Eaton KA, Mobley HLT. 2016. Siderophore vaccine  
428 conjugates protect against uropathogenic *Escherichia coli* urinary tract infection.  
429 *Proceedings of the National Academy of Sciences* 113:13468-13473.
- 430 11. Frey PA, Reed GH. 2012. The Ubiquity of Iron. *ACS Chemical Biology* 7:1477-1481.
- 431 12. Miethke M, Marahiel Mohamed A. 2007. Siderophore-Based Iron Acquisition and  
432 Pathogen Control. *Microbiology and Molecular Biology Reviews* 71:413-451.
- 433 13. Wandersman C, Stojiljkovic I. 2000. Bacterial heme sources: the role of heme,  
434 hemoprotein receptors and hemophores. *Current Opinion in Microbiology* 3:215-220.
- 435 14. Harris WR, Carrano CJ, Cooper SR, Sofen SR, Avdeef AE, McArdle JV, Raymond KN.  
436 1979. Coordination chemistry of microbial iron transport compounds. 19. Stability  
437 constants and electrochemical behavior of ferric enterobactin and model complexes.  
438 *Journal of the American Chemical Society* 101:6097-6104.
- 439 15. Perry RD, Balbo PB, Jones HA, Fetherston JD, DeMoll E. 1999. Yersiniabactin from  
440 *Yersinia pestis*: biochemical characterization of the siderophore and its role in iron  
441 transport and regulation. *Microbiology* 145:1181-1190.
- 442 16. Welch RA, Burland V, Plunkett G, 3rd, Redford P, Roesch P, Rasko D, Buckles EL, Liou  
443 SR, Boutin A, Hackett J, Stroud D, Mayhew GF, Rose DJ, Zhou S, Schwartz DC, Perna  
444 NT, Mobley HL, Donnenberg MS, Blattner FR. 2002. Extensive mosaic structure  
445 revealed by the complete genome sequence of uropathogenic *Escherichia coli*. *Proc*  
446 *Natl Acad Sci USA* 99:17020-4.
- 447 17. Henderson JP, Crowley JR, Pinkner JS, Walker JN, Tsukayama P, Stamm WE, Hooton  
448 TM, Hultgren SJ. 2009. Quantitative Metabolomics Reveals an Epigenetic Blueprint for  
449 Iron Acquisition in Uropathogenic *Escherichia coli*. *PLOS Pathogens* 5:e1000305.
- 450 18. Hagan EC, Mobley HLT. 2009. Haem acquisition is facilitated by a novel receptor Hma  
451 and required by uropathogenic *Escherichia coli* for kidney infection. *Molecular*  
452 *microbiology* 71:79-91.
- 453 19. Goetz DH, Holmes MA, Borregaard N, Bluhm ME, Raymond KN, Strong RK. 2002. The  
454 Neutrophil Lipocalin NGAL Is a Bacteriostatic Agent that Interferes with Siderophore-  
455 Mediated Iron Acquisition. *Molecular Cell* 10:1033-1043.
- 456 20. Wagegg W, Braun V. 1981. Ferric citrate transport in *Escherichia coli* requires outer  
457 membrane receptor protein fecA. *Journal of bacteriology* 145:156-163.
- 458 21. Frost GE, Rosenberg H. 1973. The inducible citrate-dependent iron transport system in  
459 *Escherichia coli* K12. *Biochimica et Biophysica Acta (BBA) - Biomembranes* 330:90-101.
- 460 22. Blum Shlomo E, Goldstone Robert J, Connolly James PR, Répérant-Ferter M, Germon  
461 P, Inglis Neil F, Krifucks O, Mathur S, Manson E, McLean K, Rainard P, Roe Andrew J,  
462 Leitner G, Smith David GE, Rappuoli R. Postgenomics Characterization of an Essential  
463 Genetic Determinant of Mammary Pathogenic *Escherichia coli*. *mBio* 9:e00423-18.
- 464 23. Pressler U, Staudenmaier H, Zimmermann L, Braun V. 1988. Genetics of the iron  
465 dicitrate transport system of *Escherichia coli*. *Journal of bacteriology* 170:2716-2724.
- 466 24. Staudenmaier H, Van Hove B, Yaraghi Z, Braun V. 1989. Nucleotide sequences of the  
467 fecBCDE genes and locations of the proteins suggest a periplasmic-binding-protein-  
468 dependent transport mechanism for iron(III) dicitrate in *Escherichia coli*. *Journal of*  
469 *bacteriology* 171:2626-2633.

- 470 25. Van Hove B, Staudenmaier H, Braun V. 1990. Novel two-component transmembrane  
471 transcription control: regulation of iron dicitrate transport in *Escherichia coli* K-12. *Journal*  
472 *of Bacteriology* 172:6749-6758.
- 473 26. Angerer A, Braun V. 1998. Iron regulates transcription of the *Escherichia coli* ferric  
474 citrate transport genes directly and through the transcription initiation proteins. *Archives*  
475 *of Microbiology* 169:483-490.
- 476 27. Braun V, Mahren S. 2005. Transmembrane transcriptional control (surface signalling) of  
477 the *Escherichia coli* Fec type. *FEMS Microbiology Reviews* 29:673-684.
- 478 28. Sintsova A, Frick-Cheng AE, Smith S, Pirani A, Subashchandrabose S, Snitkin ES,  
479 Mobley H. 2019. Genetically diverse uropathogenic *Escherichia coli* adopt a common  
480 transcriptional program in patients with UTIs. *eLife* 8:e49748.
- 481 29. Subashchandrabose S, Hazen TH, Brumbaugh AR, Himpsl SD, Smith SN, Ernst RD,  
482 Rasko DA, Mobley HLT. 2014. Host-specific induction of *Escherichia coli* fitness genes  
483 during human urinary tract infection. *Proceedings of the National Academy of Sciences*  
484 *of the United States of America* 111:18327-18332.
- 485 30. Davis JJ, Wattam AR, Aziz RK, Brettin T, Butler R, Butler RM, Chlenski P, Conrad N,  
486 Dickerman A, Dietrich EM, Gabbard JL, Gerdes S, Guard A, Kenyon RW, Machi D, Mao  
487 C, Murphy-Olson D, Nguyen M, Nordberg EK, Olsen GJ, Olson RD, Overbeek JC,  
488 Overbeek R, Parrello B, Pusch GD, Shukla M, Thomas C, VanOeffelen M, Vonstein V,  
489 Warren AS, Xia F, Xie D, Yoo H, Stevens R. 2020. The PATRIC Bioinformatics  
490 Resource Center: expanding data and analysis capabilities. *Nucleic Acids Research*  
491 48:D606-D612.
- 492 31. Himpsl SD, Pearson MM, Arewång CJ, Nusca TD, Sherman DH, Mobley HLT. 2010.  
493 Proteobactin and a yersiniabactin-related siderophore mediate iron acquisition in  
494 *Proteus mirabilis*. *Molecular microbiology* 78:138-157.
- 495 32. Anderson MT, Armstrong SK. 2008. Norepinephrine Mediates Acquisition of Transferrin-  
496 Iron in *Bordetella bronchiseptica*. *Journal of Bacteriology* 190:3940-3947.
- 497 33. Armstrong SK, Clements MO. 1993. Isolation and characterization of *Bordetella*  
498 *bronchiseptica* mutants deficient in siderophore activity. *Journal of Bacteriology*  
499 175:1144-1152.
- 500 34. Martin JE, Imlay JA. 2011. The alternative aerobic ribonucleotide reductase of  
501 *Escherichia coli*, NrdEF, is a manganese-dependent enzyme that enables cell replication  
502 during periods of iron starvation. *Molecular microbiology* 80:319-334.
- 503 35. Makui H, Roig E, Cole ST, Helmann JD, Gros P, Cellier MFM. 2000. Identification of the  
504 *Escherichia coli* K-12 Nrap orthologue (MntH) as a selective divalent metal ion  
505 transporter. *Molecular Microbiology* 35:1065-1078.
- 506 36. Pak CYC. 1991. Citrate and Renal Calculi: New Insights and Future Directions.  
507 *American Journal of Kidney Diseases* 17:420-425.
- 508 37. Friedl A, Stoesz SP, Buckley P, Gould MN. 1999. Neutrophil Gelatinase-associated  
509 Lipocalin in Normal and Neoplastic Human Tissues. *Cell Type-specific Pattern of*  
510 *Expression. The Histochemical Journal* 31:433-441.
- 511 38. Garcia Erin C, Brumbaugh Ariel R, Mobley Harry LT, Payne SM. 2011. Redundancy and  
512 Specificity of *Escherichia coli* Iron Acquisition Systems during Urinary Tract Infection.  
513 *Infection and Immunity* 79:1225-1235.
- 514 39. Forsyth VS, Himpsl SD, Smith SN, Sarkissian CA, Mike LA, Stocki JA, Sintsova A, Alteri  
515 CJ, Mobley HLT. 2020. Optimization of an Experimental Vaccine To Prevent *Escherichia*  
516 *coli* Urinary Tract Infection. *mBio* 11:e00555-20.
- 517 40. Braun V, Herrmann C. 2007. Docking of the Periplasmic FecB Binding Protein to the  
518 FecCD Transmembrane Proteins in the Ferric Citrate Transport System of *Escherichia*  
519 *coli*. *Journal of Bacteriology* 189:6913-6918.



- 520 41. Costello LC, Franklin RB. 2016. Plasma Citrate Homeostasis: How It Is Regulated; And  
521 Its Physiological and Clinical Implications. An Important, But Neglected, Relationship in  
522 Medicine. *HSOA journal of human endocrinology* 1:005.
- 523 42. Huang W-C, Wong M-Y, Wang S-H, Hashimoto M, Lin M-H, Lee M-F, Wu J-J, Wang M-  
524 C, Lin W-H, Jeng S-L, Wang J-L, Chen Y-L, Teng C-H. 2021. The Ferric Citrate Uptake  
525 System Encoded in a Novel blaCTX-M-3- and blaTEM-1-Harboring Conjugative  
526 Plasmid Contributes to the Virulence of *Escherichia coli*. *Frontiers in Microbiology* 12.
- 527 43. Steigedal M, Marstad A, Haug M, Damås JK, Strong RK, Roberts PL, Himpsl SD,  
528 Stapleton A, Hooton TM, Mobley HLT, Hawn TR, Flo TH. 2014. Lipocalin 2 Imparts  
529 Selective Pressure on Bacterial Growth in the Bladder and Is Elevated in Women with  
530 Urinary Tract Infection. *The Journal of Immunology* 193:6081.
- 531 44. Frick-Cheng AE, Sintsova A, Smith SN, Krauthammer M, Eaton KA, Mobley HLT. 2020.  
532 The Gene Expression Profile of Uropathogenic *Escherichia coli* in Women with  
533 Uncomplicated Urinary Tract Infections Is Recapitulated in the Mouse Model. *mBio*  
534 11:e01412-20.
- 535 45. Flurkey K, Curren JM, Corrigan J, Corrow D, Curren JM, Danneman P, Davisson M,  
536 Flurkey K, Harrison DE, Merriam J, Strobel M, Vonder Haar R, Witham B. 2009. The  
537 Jackson Laboratory Handbook on Genetically Standardized Mice. The Jackson  
538 Laboratory, Bar Harbor, ME 04609 USA.
- 539 46. Bushnell B. 2014. BBMap. SourceForge.
- 540 47. Kolmogorov M, Yuan J, Lin Y, Pevzner PA. 2019. Assembly of long, error-prone reads  
541 using repeat graphs. *Nature Biotechnology* 37:540-546.
- 542 48. Li H, Durbin R. 2009. Fast and accurate short read alignment with Burrows-Wheeler  
543 transform. *Bioinformatics* 25:1754-1760.
- 544 49. Danecek P, Bonfield JK, Liddle J, Marshall J, Ohan V, Pollard MO, Whitwham A, Keane  
545 T, McCarthy SA, Davies RM, Li H. 2021. Twelve years of SAMtools and BCFtools.  
546 *GigaScience* 10.
- 547 50. Anders S, Pyl PT, Huber W. 2015. HTSeq—a Python framework to work with high-  
548 throughput sequencing data. *Bioinformatics* 31:166-169.
- 549 51. Love MI, Huber W, Anders S. 2014. Moderated estimation of fold change and dispersion  
550 for RNA-seq data with DESeq2. *Genome Biology* 15:550.
- 551 52. Bachman Michael A, Oyler Jennifer E, Burns Samuel H, Caza M, Lépine F, Dozois  
552 Charles M, Weiser Jeffrey N, Bäumlér AJ. 2011. *Klebsiella pneumoniae* Yersiniabactin  
553 Promotes Respiratory Tract Infection through Evasion of Lipocalin 2. *Infection and*  
554 *Immunity* 79:3309-3316.
- 555 53. Bachman MA, Miller VL, Weiser JN. 2009. Mucosal Lipocalin 2 Has Pro-Inflammatory  
556 and Iron-Sequestering Effects in Response to Bacterial Enterobactin. *PLOS Pathogens*  
557 5:e1000622.
- 558 54. Bundgaard JR, Sengelov H, Borregaard N, Kjeldsen L. 1994. Molecular Cloning and  
559 Expression of a cDNA Encoding NGAL: A Lipocalin Expressed in Human Neutrophils.  
560 *Biochemical and Biophysical Research Communications* 202:1468-1475.
- 561 55. Flo TH, Smith KD, Sato S, Rodriguez DJ, Holmes MA, Strong RK, Akira S, Aderem A.  
562 2004. Lipocalin 2 mediates an innate immune response to bacterial infection by  
563 sequestering iron. *Nature* 432:917-921.

564

565

## Figure 1

A

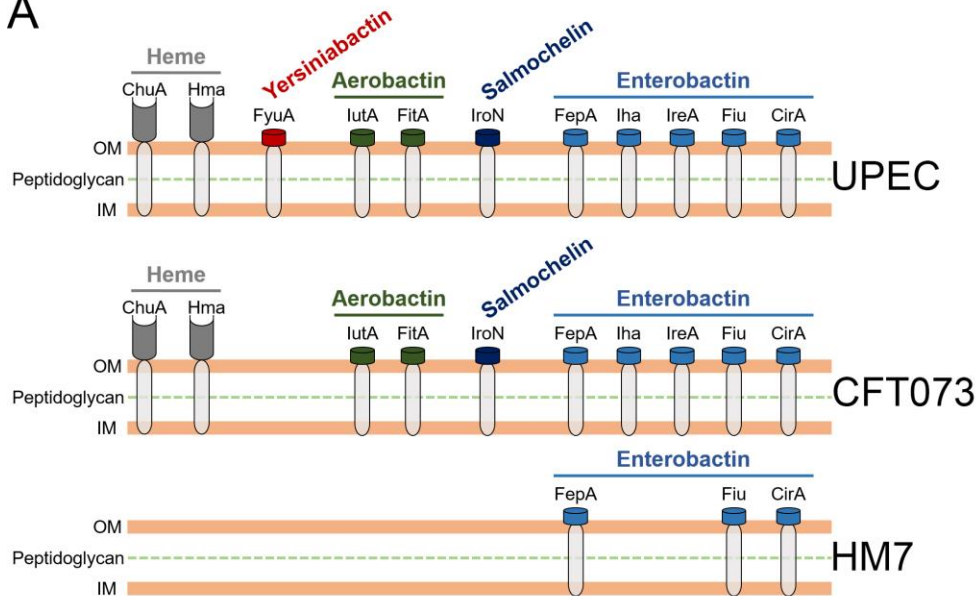

B

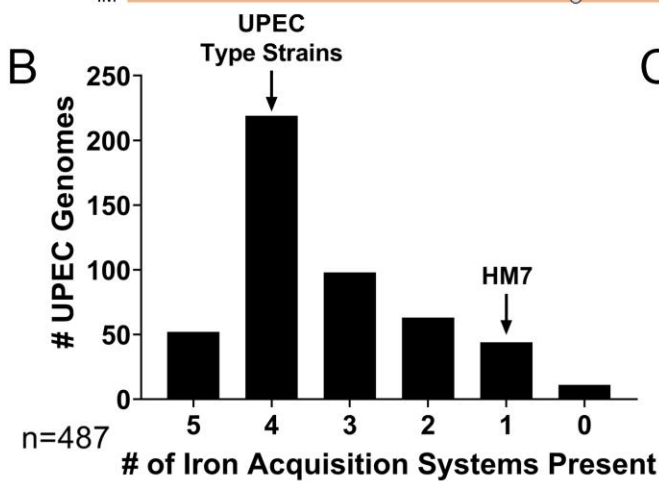

C

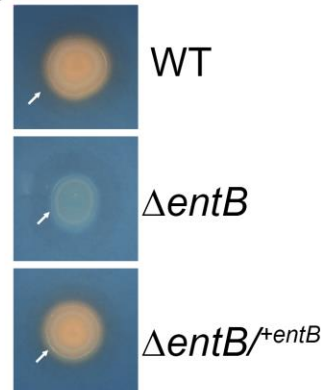

566

567 **Figure 1: Clinical UPEC isolate HM7 encodes a single iron acquisition system.** (A) Models  
568 of siderophores, siderophore uptake receptors and heme receptors in UPEC. “UPEC” indicates  
569 all known systems that have been found in UPEC while “CFT073” and “HM7” illustrate the  
570 systems in each of these indicated strains. (B) The number of iron acquisition systems present  
571 in cohort of 487 UPEC strains on the bioinformatics resource PATRIC. The five systems are  
572 composed of heme uptake (ChuA or Hma), and four siderophores (enterobactin, salmochelin,  
573 aerobactin and yersiniabactin). Presence was determined by at  $\geq 80\%$  protein identity and  
574 coverage of select genes for each system: heme uptake (*chuA* or *hma*), enterobactin (*entB*),  
575 salmochelin (*iroB*), aerobactin (*iucA*), and yersiniabactin (*irp1*). Genes selected for siderophores  
576 are all involved in biosynthesis. 11% of strains have five systems, 45% of strains have four,  
577 20% of strains have three, 13% of strains have two, 9% of strains have one, and 2% appear to have  
578 none. (C) Siderophore production assayed through growth on CAS agar. 5  $\mu$ L of an overnight  
579 LB culture were spotted on CAS agar and grown overnight at 37°C. A change from blue to  
580 orange indicates siderophore activity. White arrow indicates the colony in all three strains, and  
581 the orange halo in WT and complemented strain is due to diffusion of secreted siderophore.

Figure 2

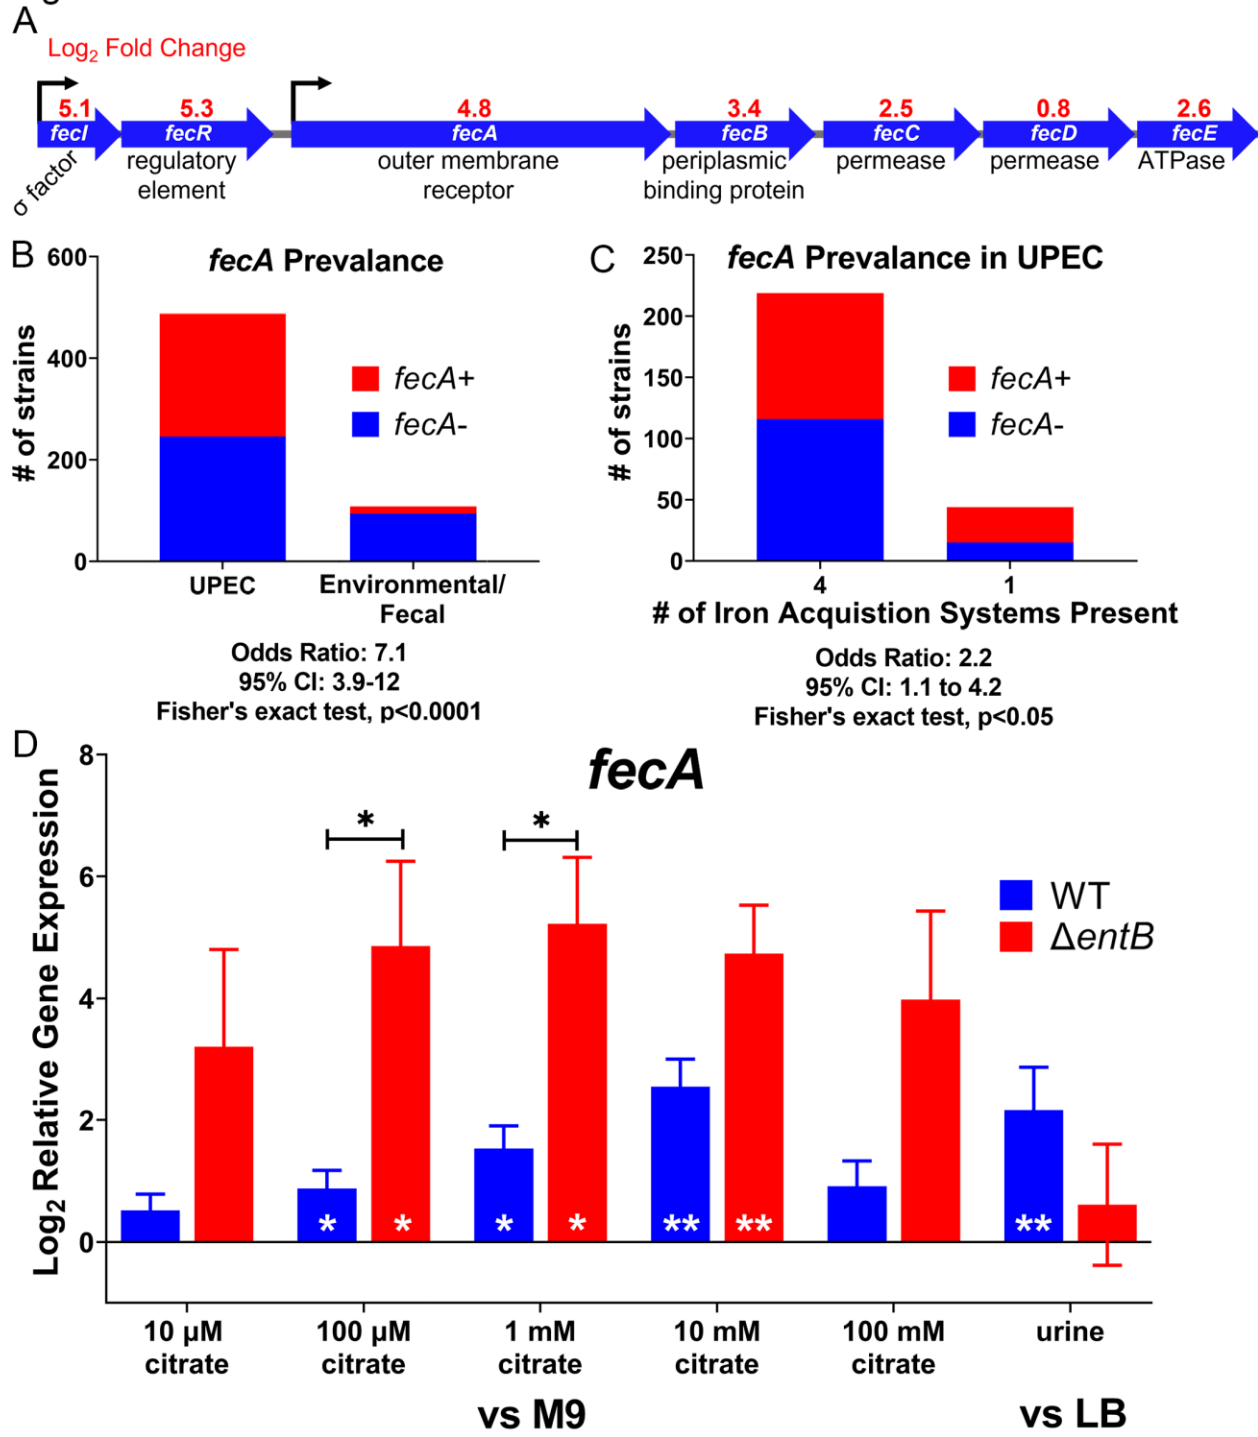

582

583 **Figure 2: Ferric citrate uptake is a potential iron acquisition system in UPEC.** (A) RNAseq  
 584 revealed the ferric citrate uptake system (*fecABCDE* and *fecIR*) is upregulated in WT HM7  
 585 under iron limitation (M9 supplemented with 36 $\mu$ M FeCl<sub>3</sub> versus M9 with 150  $\mu$ M 2,2 dipyridyl).  
 586 (B) *fecA* is enriched in UPEC strains compared to *E. coli* fecal or environmental isolates. 487  
 587 UPEC strains and 107 fecal or environmental strains were analyzed; presence of *fecA* was

588 determined by  $\geq 80\%$  protein identity and coverage. (C) *fecA* is enriched in UPEC strains with a  
 589 single traditional iron acquisition system (“HM7-like”), compared to strains with four traditional  
 590 iron acquisition systems. (D) Gene expression of *fecA* in HM7 in either M9 medium with 0.4%  
 591 glucose supplemented with increasing amounts of citrate, or in pooled human urine. Gene  
 592 expression was assayed through qRT-PCR. Bars are the average of five (WT) and four ( $\Delta entB$ )  
 593 biological replicates, bars are mean, error bars are  $\pm$ SEM. Black asterisks compare gene  
 594 expression between WT and the  $\Delta entB$  mutant using mixed-effects analysis with Sidak’s  
 595 multiple test correction, \*  $p < 0.05$ . White asterisks indicate significant upregulation, determined  
 596 by one sample t-test, \*  $p < 0.05$ , \*\*  $p < 0.005$ .

597

## Figure 3

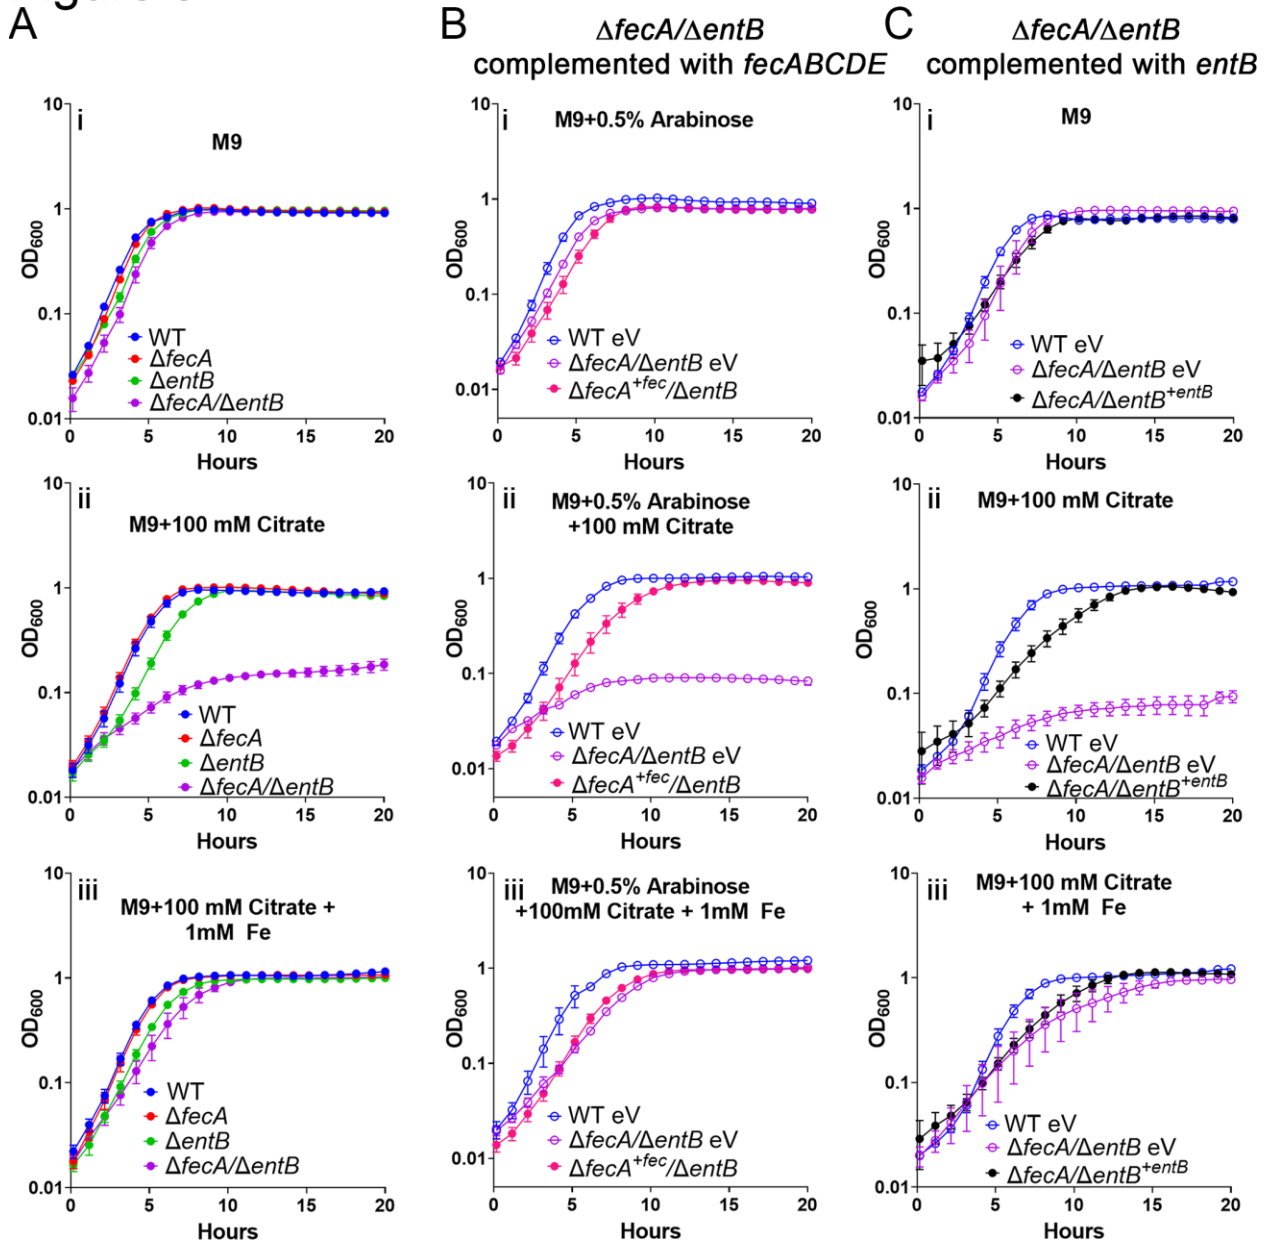

598

599

**Figure 3: HM7 uses ferric citrate as an iron source through the *fec* system and**

600 **enterobactin**. Growth in M9 medium (i), M9 medium supplemented with 100 mM citrate (ii),  
 601 and M9 medium supplemented with both 100 mM citrate and 1 mM FeCl<sub>3</sub> (iii) of (A) WT HM7,  
 602 single mutants  $\Delta fecA$ ,  $\Delta entB$  and double mutant  $\Delta fecA/\Delta entB$ , (B) WT HM7 expressing empty  
 603 pBAD vector (WT eV), and  $\Delta fecA/\Delta entB$  expressing empty pBAD vector ( $\Delta fecA/\Delta entB$  eV), and  
 604  $\Delta fecA/\Delta entB$  complemented with *fecABCDE* ( $\Delta fecA^{+fec}/\Delta entB$ ). All media in these conditions  
 605 are supplemented with 0.5% arabinose to induce expression. (C) WT HM7 expressing empty  
 606 pGEN vector (WT eV), and  $\Delta fecA/\Delta entB$  expressing empty pGEN vector ( $\Delta fecA/\Delta entB$  eV), and  
 607  $\Delta fecA/\Delta entB$  complemented with *entB* under control of its native promoter ( $\Delta fecA/\Delta entB^{+entB}$ ).  
 608 0.4% glucose was used as the sole carbon source in all conditions. Growth curves show  
 609 averages of three to five biological replicates, error bars are SEM.

610

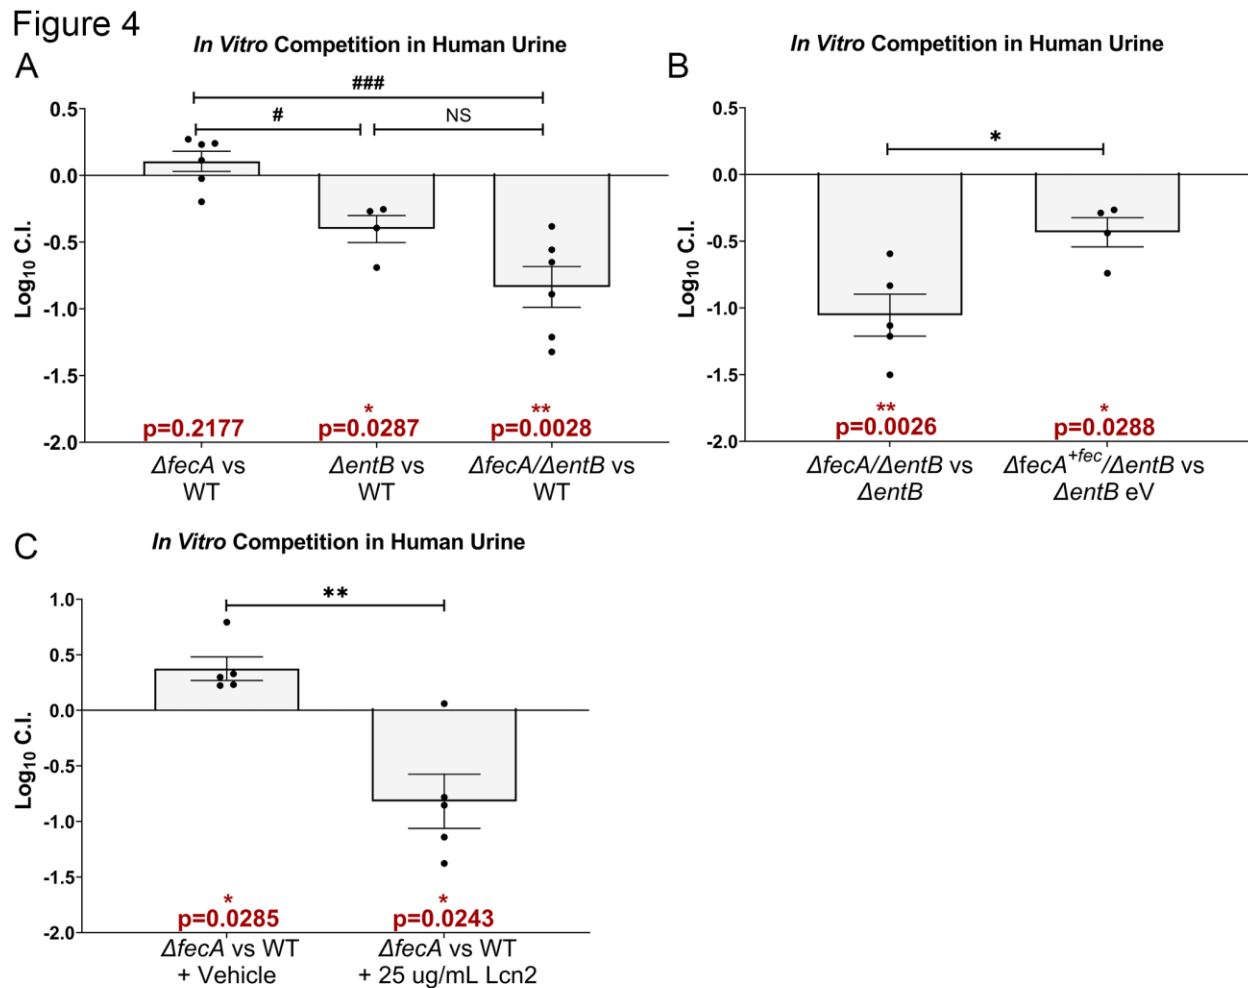

611

612 **Figure 4: Ferric citrate uptake is an *in vitro* fitness factor in the absence of enterobactin.**  
 613 *In vitro* fitness of strains or conditions were determined in *ex vivo* pooled human urine. All  
 614 strains were inoculated in a 1:1 ratio and grown for 24 hours at 37°C with aeration and their  
 615 log<sub>10</sub> competitive index (C.I.) determined. A log<sub>10</sub> C.I. <0 indicates the first listed strain was  
 616 outcompeted by the second. (A) Indicated strains were competed. (B) The  $\Delta entB$  mutant  
 617 expressing an empty vector ( $\Delta entB$  eV) and the  $\Delta fecA/\Delta entB$  double mutant with the *fec* operon  
 618 complemented in *trans* ( $\Delta fecA^{+fec}/\Delta entB$ ) were competed in urine supplemented with 0.5%

619 arabinose and ampicillin (100 µg/mL). (C) WT HM7 was competed with  $\Delta fecA$  and the urine was  
620 supplemented with either recombinant human lipocalin (Lcn2) or an equal volume of vehicle  
621 (25% glycerol). Red asterisks (\*) indicate a significant competitive disadvantage, determined by  
622 one sample t-test, \*  $p < 0.05$ , \*\*  $p < 0.005$ . Hashtags (#) compare  $\log_{10}$  C.I. between indicated  
623 strains using ordinary one-way ANOVA with Sidak's multiple test correction, #  $p < 0.05$ , ###  
624  $p < 0.001$ . Black asterisks (\*) compare  $\log_{10}$  CI between indicated strains or conditions using  
625 unpaired t test, \*  $p < 0.05$ , \*\*  $p < 0.005$ . Bars indicate mean, error bars are  $\pm$ SEM, each dot  
626 represents an independent experiment.

## Figure 5

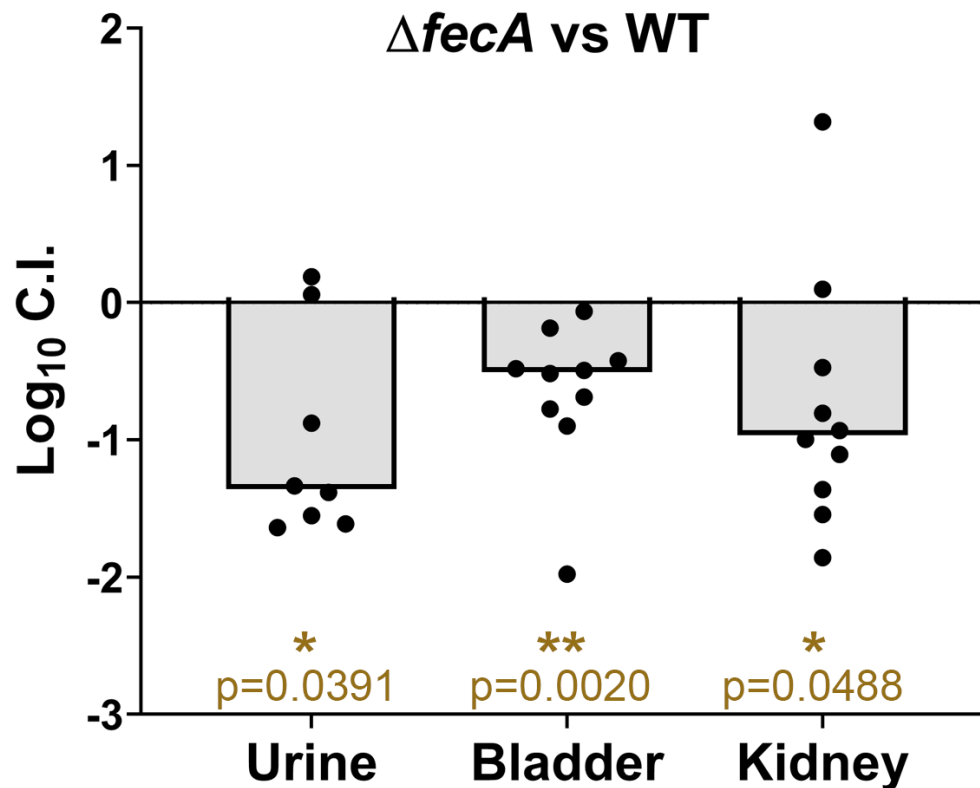

627

628 **Figure 5: Ferric citrate uptake is an *in vivo* fitness factor.** WT HM7 and single mutant  $\Delta fecA$   
629 were combined in a 1:1 ratio and transurethrally inoculated into CBA/J mice. Competitive  
630 indices were calculated 48 hours post infection. Symbols are individual animals, bars are  
631 median. Significance was determined with Wilcoxon signed-rank test, \*  $p < 0.05$ , \*\*  $p < 0.005$

632

# Figure 6

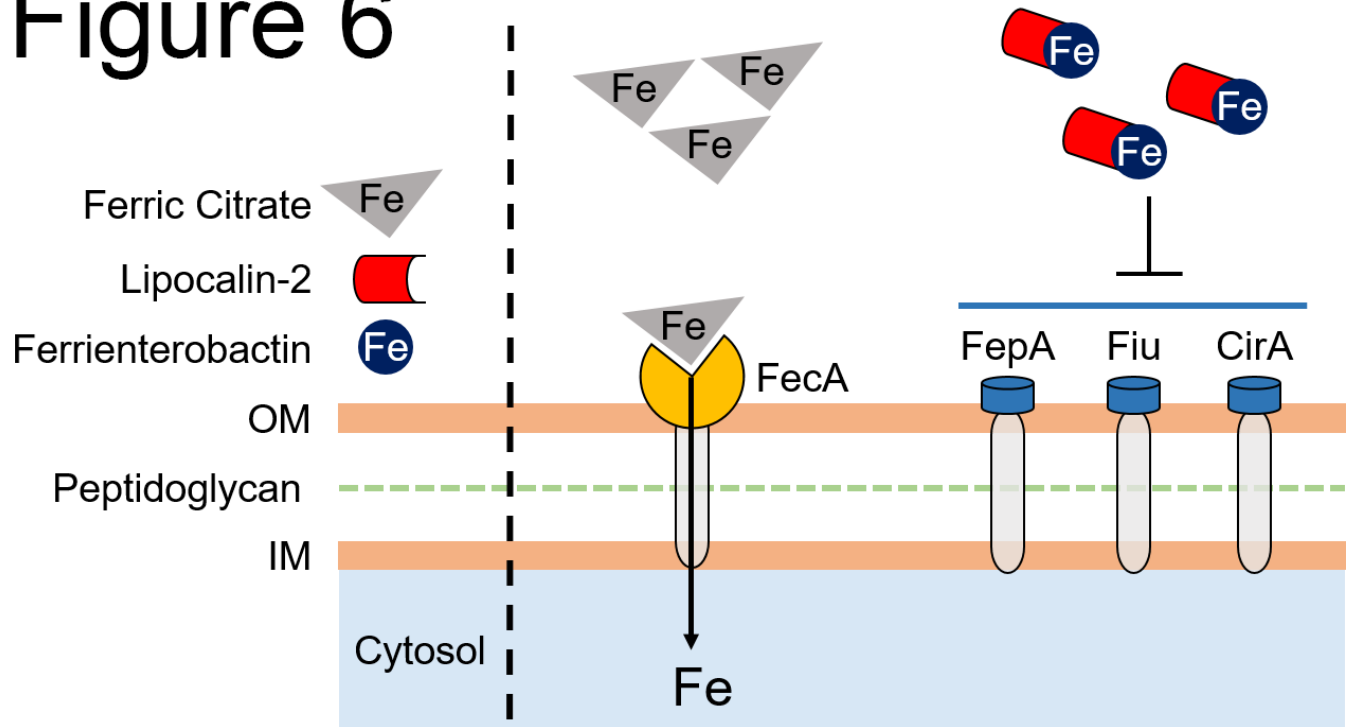

633

634 **Figure 6: Model of UPEC utilization of ferric citrate.**

635

636 **Supplemental Figures**

Supplemental Figure 1

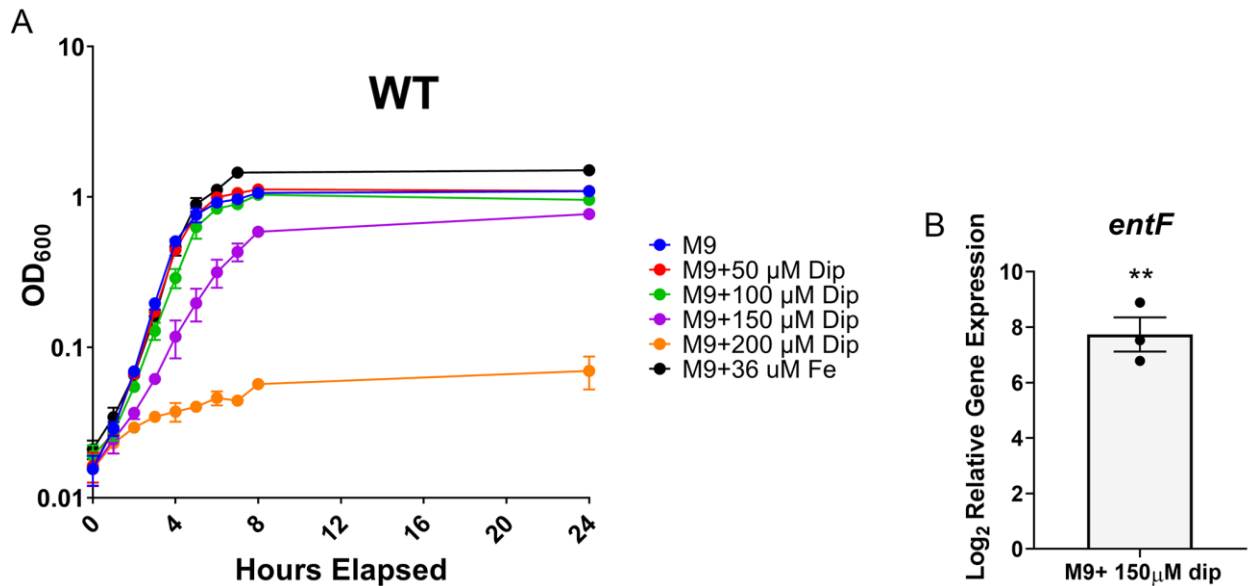

637

638 **Supplemental Figure 1.** (A) Growth of WT HM7 in M9 medium with 0.4% glucose as the sole  
639 carbon source (M9), as well as supplemented with 36 μM FeCl<sub>3</sub> or increasing amounts of the  
640 iron chelator 2,2'-dipyridyl (Dip). WT HM7 was cultured overnight in M9, and then subcultured  
641 1:100 into 3 mL medium in culture tubes and grown at 37°C with aeration. OD<sub>600</sub> was measured  
642 on a plate reader for eight hours, taking a reading every hour, and then another reading was  
643 taken at 24 hours. Results are an average of three to four biological replicates, error bars  
644 represent ±SEM. (B) Gene expression of *entF* in WT HM7 in M9 medium supplemented with  
645 150 μM Dip compared to M9 supplemented with 36 μM FeCl<sub>3</sub>. Gene expression was assayed  
646 through qRT-PCR. Bars are the average of three biological replicates, dots are the values from  
647 each biological replicate and error bars are ±SEM, and asterisks indicate significant  
648 upregulation, determined by one sample t-test, \*\* p<0.01.



## Supplemental Figure 2

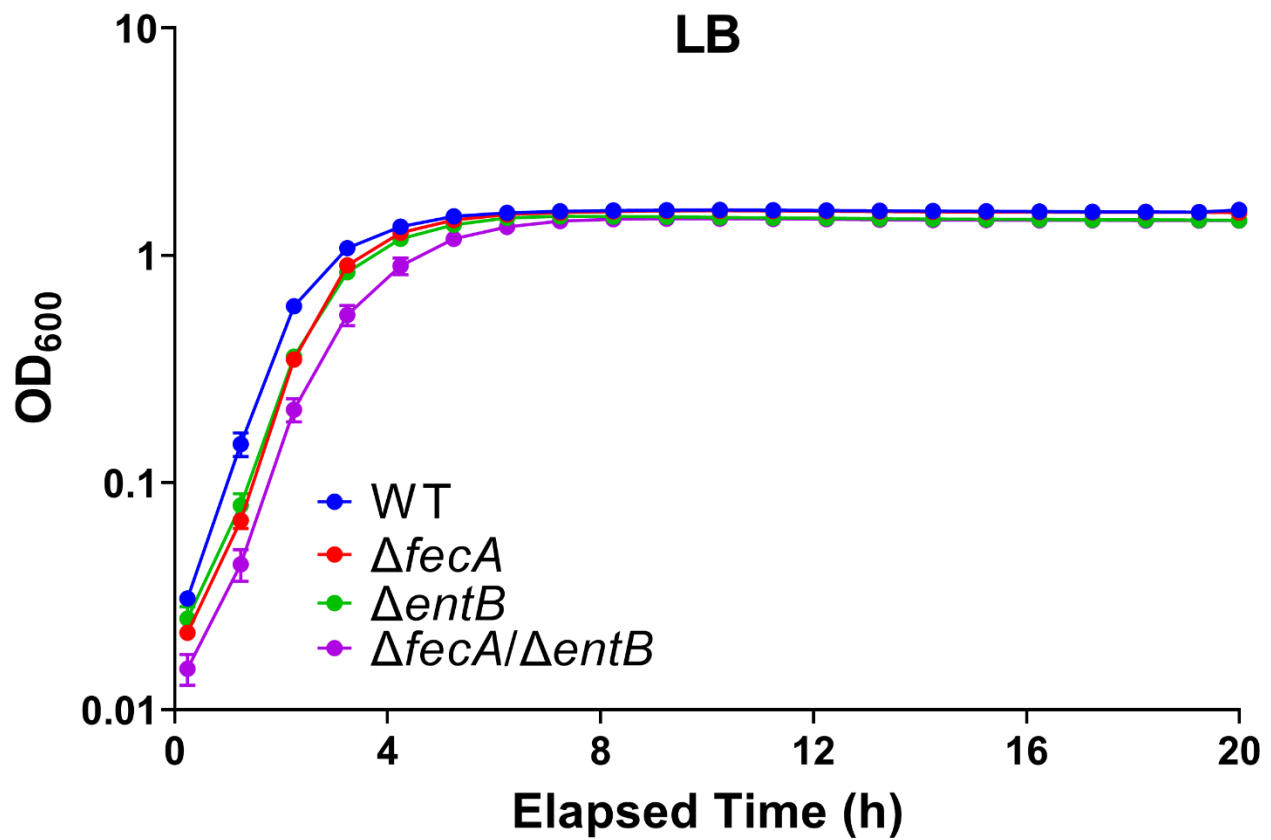

649

650 **Supplemental Figure 2.** Growth of WT HM7,  $\Delta fecA$ ,  $\Delta entB$ , and  $\Delta fecA/\Delta entB$ , in LB. Results  
651 are an average of four to five biological replicates, bars represent  $\pm$ SEM.

## Supplemental Figure 3

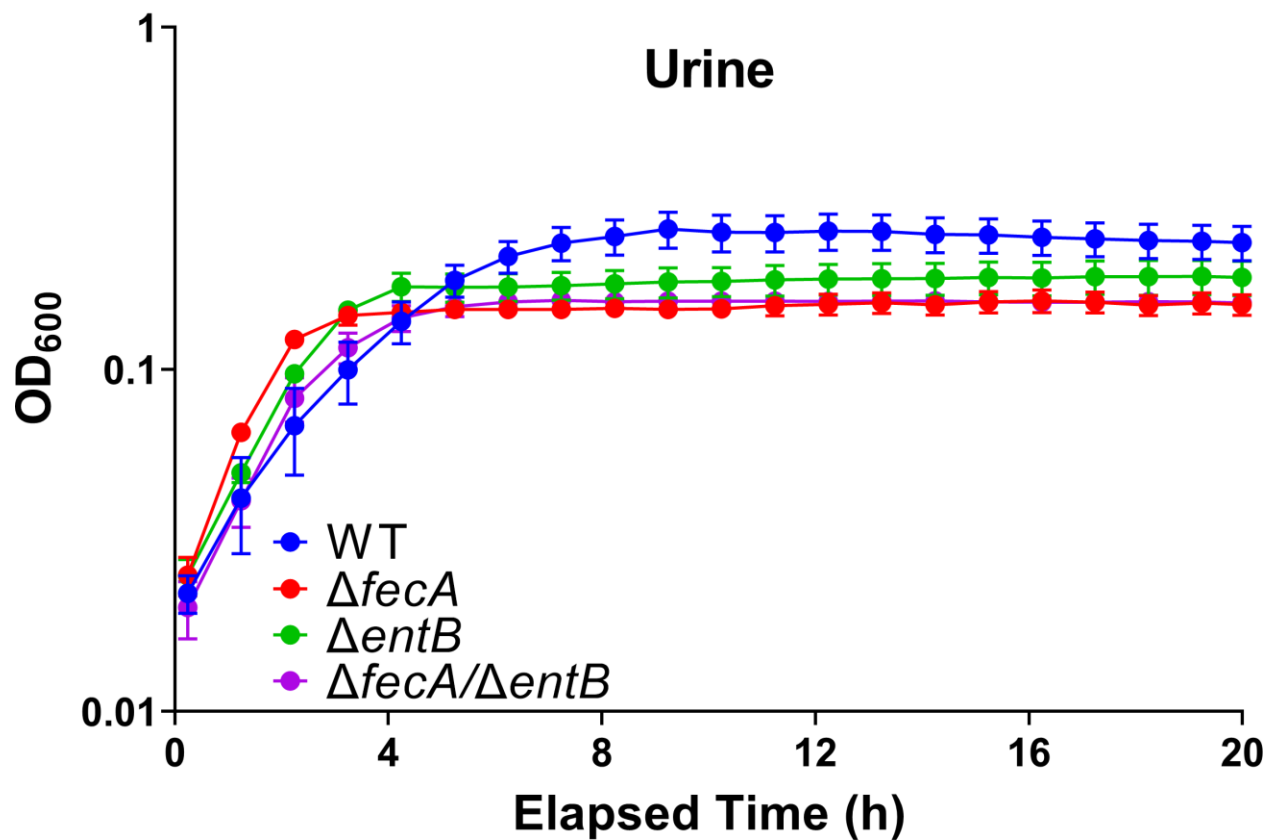

652

653 **Supplemental Figure 3.** Growth of WT HM7,  $\Delta fecA$ ,  $\Delta entB$ , and  $\Delta fecA/\Delta entB$  in *ex vivo* urine  
654 pooled from healthy female volunteers. Results are an average of four to five biological  
655 replicates, bars represent  $\pm$ SEM.

656

## Supplemental Figure 4

### M9 + 150 $\mu$ M Dip

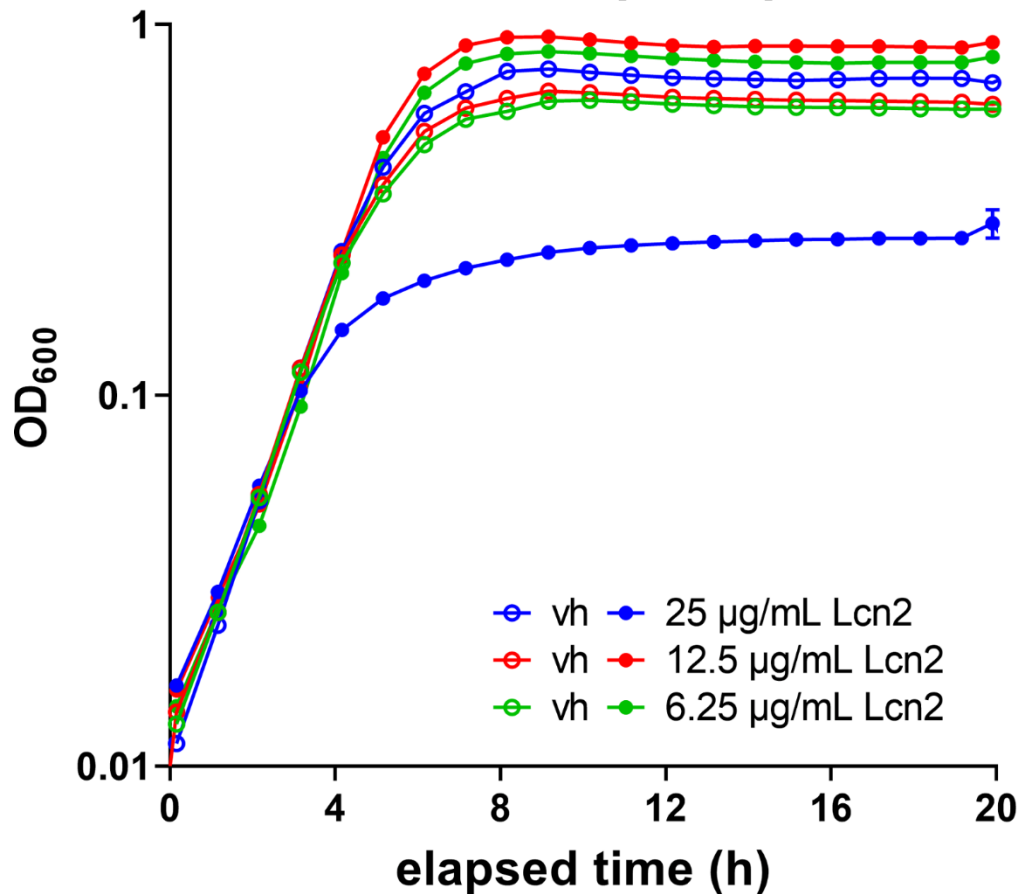

675 **Supplemental Figure 4.** Growth of WT HM7 supplemented with recombinant human lipocalin  
676 (Lcn2). WT HM7 was grown in an iron starved state (M9 medium supplemented with 150  $\mu$ M  
677 Dip) with increasing amounts of Lcn2. An equal volume of the vehicle (vh, 25% glycerol) for  
678 each amount was added as a control. Results are an average of two biological replicates, bars  
679 represent  $\pm$ SEM.

680

681

682

683

684

685

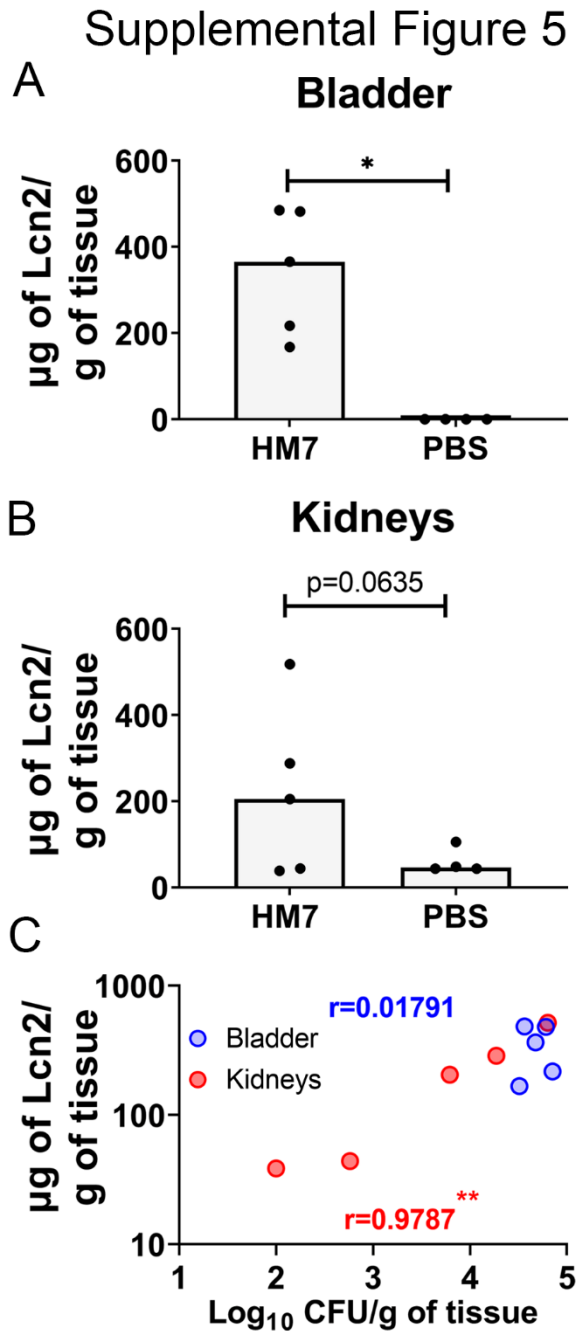

**Supplemental Figure 5.** Quantification of lipocalin (Lcn2) production during murine infection. CBA/J mice were infected either with WT HM7 or mock infected with PBS. Lcn2 levels were quantified via ELISA in the (A) bladder and (B) kidneys. (C) Lcn2 levels were plotted against CFU burden of mice infected with HM7. Pearson correlation coefficient ( $r$ ) for bladder is displayed in blue, and for kidneys is displayed in red. Dots indicate individual mice, bars are median. Significance was determined via Mann-Whitney test, \*  $p < 0.05$ .

## Supplemental Figure 6

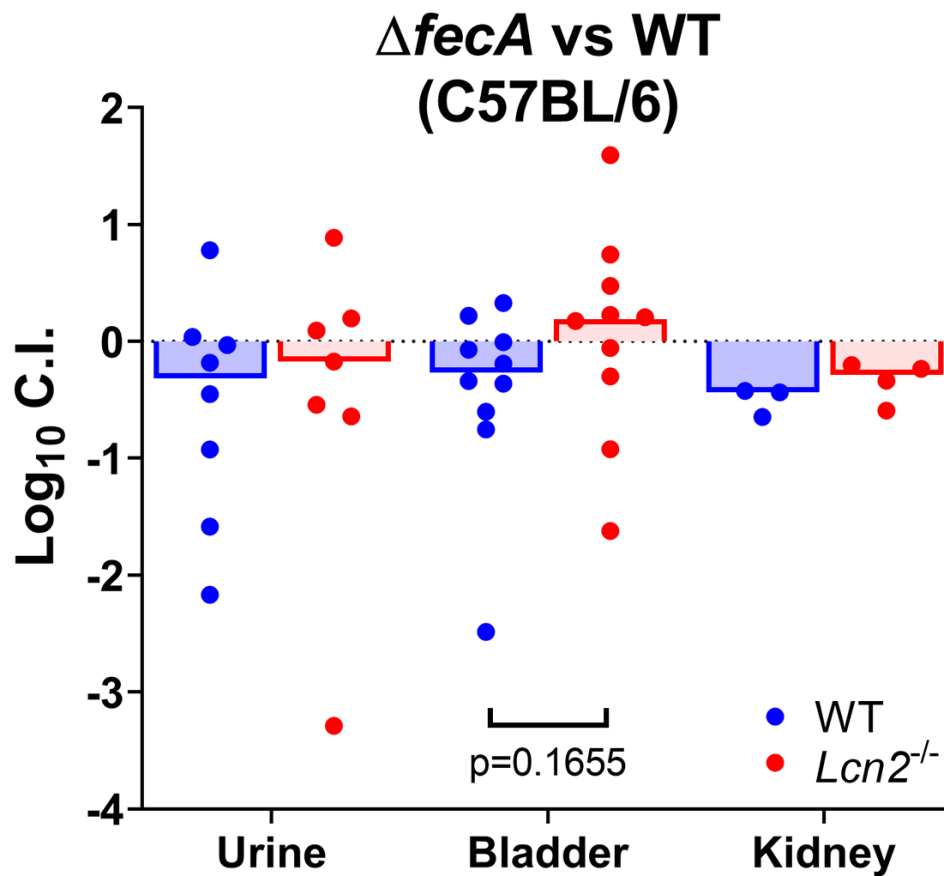

700

701 **Supplemental Figure 6.** WT HM7 competed with  $\Delta fecA$  in WT C57BL/6 mice (WT) and  
702 lipocalin null (*Lcn2*<sup>-/-</sup>) mice. Competitive indices were calculated 48 hours post infection.  
703 Historically, C57BL/6 mice have poor kidney colonization; only 3/10 WT mice and 4/10 *Lcn2*<sup>-/-</sup>  
704 mice had detectable CFU in the kidney. Dots are individual animals, bars are median. Log<sub>10</sub>CIs  
705 were compared using Mann-Whitney test.

706

707
